# Supplementary material for: Dysregulated IER3 Expression is Associated with Enhanced Apoptosis in Titin-Based Dilated Cardiomyopathy
Source: PubMed Central journal article supplement (PMC5412309; doi:10.3390/ijms18040723), 2017-03-29
Supplement: ijms-18-00723-s001.pdf [file ijms-18-00723-s001.pdf]

**Zhou et al. Dysregulated IER3 expression is associated with enhanced apoptosis in titin-based dilated cardiomyopathy**

Supplemental Table 1

List of primer sequences

| Primer Name     | Primer Sequence             |
|-----------------|-----------------------------|
| IEX-1-RT-for    | CAGCCGAAGGGTGCTCTAC         |
| IEX-1-RT-rev    | AAATCTGGCAGAAGATGATGG       |
| Akt1-RT-for     | ATGAACGACGTAGCCATTGTG       |
| Akt1-RT-rev     | TTGTAGCCAATAAAGGTGCCAT      |
| Bcl-2-RT-for    | ATGCCTTTGTGGA ACTATATGGC    |
| Bcl-2-RT-rev    | GGTATGCACCCAGAGTGATGC       |
| Bcl2l1-RT-for   | GACAAGGAGATGCAGGTATTGG      |
| Bcl2l1-RT-rev   | TCCCGTAGAGATCCACAAAAGT      |
| CRADD-RT-for    | AAGGCGAGAGAGGAAGTCACA       |
| CRADD-RT-rev    | GTTAATCTGCTGGTCTGATGGC      |
| BAD-RT-for      | GAGGAGGAGCTTAGCCCTTT        |
| BAD-RT-rev      | AGGAACCCTCAA ACTCATCG       |
| BAK1-RT-for     | ATATTAACCGGCGCTACGAC        |
| BAK1-RT-rev     | AGGCGATCTTGGTGAAGAGT        |
| GAPDH-RT-for    | ATCTTCTTGTGCAGTGCCAGCCTCGTC |
| GAPDH-RT-rev    | CTTCCCATTCTCGGCCTTGACTGTGC  |
| Akt1-ChIP-for   | CCCCAAGCCTCACCCATCTG        |
| Akt1-ChIP-rev   | CCAACCAGTACTGCCTGCCACAG     |
| Bcl-2-ChIP-for  | CAGCCGCAGCCGTCACCGTG        |
| Bcl-2-ChIP-rev  | GCTGCGCACCTTTCTCCTCCTC      |
| Bcl2l1-ChIP-for | CAGCACGAGCAGTCAGCCAGGTAG    |
| Bcl2l1-ChIP-rev | AGGCCAGTGGCTTCCAGACAC       |
| CRADD-ChIP-for  | TCGTGGTAGCTCTAACTGTGCCAC    |
| CRADD-ChIP-rev  | AGGTGAGGAGGGCGTGGGTGAC      |
| BAD-ChIP-for    | GGGCAGCGTACGCACACCTATC      |
| BAD-ChIP-rev    | TCGGGAGCTCCTTTACGGCAG       |
| BAK1-ChIP-for   | CCTCTATTTTCATGATCCTCCTGCTTC |
| BAK1-ChIP-rev   | CGGGCCTCCTTCCATCTTCTC       |
| AlFm1-ChIP-for  | GGTTTGAATGTGTCATGGCCACTGTC  |
| AlFm1-ChIP-rev  | CAGACAGGAGGGAGGCAAAGGACAG   |

**Zhou et al. Dysregulated IER3 expression is associated with enhanced apoptosis in titin-based dilated cardiomyopathy**

Supplemental Table 2

**IER3 ChiP-Seq: List of enriched sequences**

FIMO analysis of IER3 target

| #pattern value | name                      | sequence | name | start | stop | strand | score | p-value | q-     |
|----------------|---------------------------|----------|------|-------|------|--------|-------|---------|--------|
| 1              | mm10_knownGene_uc008bhj.2 |          |      | 1     | 7    | +      |       | 10.8143 | 9.74e- |
| 05             | 0.253                     | CTCCCTG  |      |       |      |        |       |         |        |
| 1              | mm10_knownGene_uc008zvu.2 |          |      | 1     | 7    | +      |       | 10.8143 | 9.74e- |
| 05             | 0.253                     | CTCCCTG  |      |       |      |        |       |         |        |
| 1              | mm10_knownGene_uc029srq.1 |          |      | 1     | 7    | +      |       | 10.8143 | 9.74e- |
| 05             | 0.253                     | CTTCCTG  |      |       |      |        |       |         |        |
| 1              | mm10_knownGene_uc007ziu.1 |          |      | 1     | 7    | +      |       | 10.8143 | 9.74e- |
| 05             | 0.253                     | CTTCCTG  |      |       |      |        |       |         |        |
| 1              | mm10_knownGene_uc029ufu.1 |          |      | 1     | 7    | +      |       | 10.8143 | 9.74e- |
| 05             | 0.253                     | CTTCCTG  |      |       |      |        |       |         |        |
| 1              | mm10_knownGene_uc008rxa.1 |          |      | 1     | 7    | +      |       | 10.8143 | 9.74e- |
| 05             | 0.253                     | CTTCCTG  |      |       |      |        |       |         |        |
| 1              | mm10_knownGene_uc008zwd.2 |          |      | 1     | 7    | +      |       | 10.8143 | 9.74e- |
| 05             | 0.253                     | CTCCCTG  |      |       |      |        |       |         |        |
| 1              | mm10_knownGene_uc009fyh.1 |          |      | 1     | 7    | +      |       | 10.8143 | 9.74e- |
| 05             | 0.253                     | CTTCCTG  |      |       |      |        |       |         |        |
| 1              | mm10_knownGene_uc007aot.3 |          |      | 1     | 7    | +      |       | 10.8143 | 9.74e- |
| 05             | 0.253                     | CTTCCTG  |      |       |      |        |       |         |        |
| 1              | mm10_knownGene_uc008zvw.2 |          |      | 1     | 7    | +      |       | 10.8143 | 9.74e- |
| 05             | 0.253                     | CTCCCTG  |      |       |      |        |       |         |        |
| 1              | mm10_knownGene_uc012esy.1 |          |      | 1     | 7    | +      |       | 10.8143 | 9.74e- |
| 05             | 0.253                     | CTTCCTG  |      |       |      |        |       |         |        |
| 1              | mm10_knownGene_uc012esx.1 |          |      | 1     | 7    | +      |       | 10.8143 | 9.74e- |
| 05             | 0.253                     | CTTCCTG  |      |       |      |        |       |         |        |
| 1              | mm10_knownGene_uc029rfq.1 |          |      | 1     | 7    | +      |       | 10.8143 | 9.74e- |
| 05             | 0.253                     | CTTCCTG  |      |       |      |        |       |         |        |
| 1              | mm10_knownGene_uc008zvy.2 |          |      | 1     | 7    | +      |       | 10.8143 | 9.74e- |
| 05             | 0.253                     | CTCCCTG  |      |       |      |        |       |         |        |
| 1              | mm10_knownGene_uc056zpe.1 |          |      | 1     | 7    | +      |       | 10.8143 | 9.74e- |
| 05             | 0.253                     | CTTCCTG  |      |       |      |        |       |         |        |
| 1              | mm10_knownGene_uc008zvv.2 |          |      | 1     | 7    | +      |       | 10.8143 | 9.74e- |
| 05             | 0.253                     | CTCCCTG  |      |       |      |        |       |         |        |
| 1              | mm10_knownGene_uc008zwe.2 |          |      | 1     | 7    | +      |       | 10.8143 | 9.74e- |
| 05             | 0.253                     | CTCCCTG  |      |       |      |        |       |         |        |
| 1              | mm10_knownGene_uc008zwc.2 |          |      | 1     | 7    | +      |       | 10.8143 | 9.74e- |
| 05             | 0.253                     | CTCCCTG  |      |       |      |        |       |         |        |
| 1              | mm10_knownGene_uc012bb1.1 |          |      | 1     | 7    | +      |       | 10.8143 | 9.74e- |
| 05             | 0.253                     | CTTCCTG  |      |       |      |        |       |         |        |
| 1              | mm10_knownGene_uc012dah.1 |          |      | 1     | 7    | +      |       | 10.8143 | 9.74e- |
| 05             | 0.253                     | CTTCCTG  |      |       |      |        |       |         |        |
| 1              | mm10_knownGene_uc009dsh.1 |          |      | 1     | 7    | +      |       | 10.8143 | 9.74e- |
| 05             | 0.253                     | CTCCCTG  |      |       |      |        |       |         |        |
| 1              | mm10_knownGene_uc009cmd.1 |          |      | 1     | 7    | +      |       | 10.8143 | 9.74e- |
| 05             | 0.253                     | CTCCCTG  |      |       |      |        |       |         |        |
| 1              | mm10_knownGene_uc008gms.1 |          |      | 1     | 7    | +      |       | 10.8143 | 9.74e- |
| 05             | 0.253                     | CTCCCTG  |      |       |      |        |       |         |        |
| 1              | mm10_knownGene_uc008zwh.2 |          |      | 1     | 7    | +      |       | 10.8143 | 9.74e- |
| 05             | 0.253                     | CTCCCTG  |      |       |      |        |       |         |        |

|    |                           |   |   |   |                |
|----|---------------------------|---|---|---|----------------|
| 1  | mm10_knownGene_uc009dsg.1 | 1 | 7 | + | 10.8143 9.74e- |
| 05 | 0.253 CTCCCTG             |   |   |   |                |
| 1  | mm10_knownGene_uc008zvx.2 | 1 | 7 | + | 10.8143 9.74e- |
| 05 | 0.253 CTCCCTG             |   |   |   |                |
| 1  | mm10_knownGene_uc008zvv.2 | 1 | 7 | + | 10.8143 9.74e- |
| 05 | 0.253 CTCCCTG             |   |   |   |                |
| 1  | mm10_knownGene_uc008zwa.2 | 1 | 7 | + | 10.8143 9.74e- |
| 05 | 0.253 CTCCCTG             |   |   |   |                |
| 1  | mm10_knownGene_uc008zwb.2 | 1 | 7 | + | 10.8143 9.74e- |
| 05 | 0.253 CTCCCTG             |   |   |   |                |
| 1  | mm10_knownGene_uc009fyk.1 | 1 | 7 | + | 10.8143 9.74e- |
| 05 | 0.253 CTTCCCTG            |   |   |   |                |
| 1  | mm10_knownGene_uc057bgi.1 | 2 | 8 | + | 10.8143 9.74e- |
| 05 | 0.253 CTTCCCTG            |   |   |   |                |
| 1  | mm10_knownGene_uc007ziy.3 | 2 | 8 | + | 10.8143 9.74e- |
| 05 | 0.253 CTTCCCTG            |   |   |   |                |
| 1  | mm10_knownGene_uc008kut.2 | 2 | 8 | + | 10.8143 9.74e- |
| 05 | 0.253 CTTCCCTG            |   |   |   |                |
| 1  | mm10_knownGene_uc008yhe.1 | 2 | 8 | + | 10.8143 9.74e- |
| 05 | 0.253 CTTCCCTG            |   |   |   |                |
| 1  | mm10_knownGene_uc009pky.1 | 2 | 8 | + | 10.8143 9.74e- |
| 05 | 0.253 CTTCCCTG            |   |   |   |                |
| 1  | mm10_knownGene_uc008cux.1 | 2 | 8 | + | 10.8143 9.74e- |
| 05 | 0.253 CTCCCTG             |   |   |   |                |
| 1  | mm10_knownGene_uc009grd.2 | 2 | 8 | + | 10.8143 9.74e- |
| 05 | 0.253 CTCCCTG             |   |   |   |                |
| 1  | mm10_knownGene_uc012bzh.1 | 2 | 8 | + | 10.8143 9.74e- |
| 05 | 0.253 CTTCCCTG            |   |   |   |                |
| 1  | mm10_knownGene_uc007zix.3 | 2 | 8 | + | 10.8143 9.74e- |
| 05 | 0.253 CTTCCCTG            |   |   |   |                |
| 1  | mm10_knownGene_uc008gij.1 | 2 | 8 | + | 10.8143 9.74e- |
| 05 | 0.253 CTCCCTG             |   |   |   |                |
| 1  | mm10_knownGene_uc008vgj.2 | 2 | 8 | + | 10.8143 9.74e- |
| 05 | 0.253 CTTCCCTG            |   |   |   |                |
| 1  | mm10_knownGene_uc009pkz.1 | 2 | 8 | + | 10.8143 9.74e- |
| 05 | 0.253 CTTCCCTG            |   |   |   |                |
| 1  | mm10_knownGene_uc008vgl.2 | 2 | 8 | + | 10.8143 9.74e- |
| 05 | 0.253 CTTCCCTG            |   |   |   |                |
| 1  | mm10_knownGene_uc007tav.1 | 2 | 8 | + | 10.8143 9.74e- |
| 05 | 0.253 CTCCCTG             |   |   |   |                |
| 1  | mm10_knownGene_uc009pla.1 | 2 | 8 | + | 10.8143 9.74e- |
| 05 | 0.253 CTTCCCTG            |   |   |   |                |
| 1  | mm10_knownGene_uc009siw.1 | 2 | 8 | + | 10.8143 9.74e- |
| 05 | 0.253 CTCCCTG             |   |   |   |                |
| 1  | mm10_knownGene_uc007khj.2 | 2 | 8 | + | 10.8143 9.74e- |
| 05 | 0.253 CTCCCTG             |   |   |   |                |
| 1  | mm10_knownGene_uc029sdv.1 | 2 | 8 | + | 10.8143 9.74e- |
| 05 | 0.253 CTCCCTG             |   |   |   |                |
| 1  | mm10_knownGene_uc029vel.1 | 2 | 8 | + | 10.8143 9.74e- |
| 05 | 0.253 CTCCCTG             |   |   |   |                |
| 1  | mm10_knownGene_uc009pxv.1 | 2 | 8 | + | 10.8143 9.74e- |
| 05 | 0.253 CTCCCTG             |   |   |   |                |
| 1  | mm10_knownGene_uc008kuu.2 | 2 | 8 | + | 10.8143 9.74e- |
| 05 | 0.253 CTTCCCTG            |   |   |   |                |
| 1  | mm10_knownGene_uc008kva.2 | 2 | 8 | + | 10.8143 9.74e- |
| 05 | 0.253 CTTCCCTG            |   |   |   |                |
| 1  | mm10_knownGene_uc007ziz.2 | 2 | 8 | + | 10.8143 9.74e- |
| 05 | 0.253 CTTCCCTG            |   |   |   |                |
| 1  | mm10_knownGene_uc007khi.2 | 2 | 8 | + | 10.8143 9.74e- |
| 05 | 0.253 CTCCCTG             |   |   |   |                |
| 1  | mm10_knownGene_uc008vgk.2 | 2 | 8 | + | 10.8143 9.74e- |
| 05 | 0.253 CTTCCCTG            |   |   |   |                |

|    |                            |   |   |   |                |
|----|----------------------------|---|---|---|----------------|
| 1  | mm10_knownGene_uc007khh.2  | 2 | 8 | + | 10.8143 9.74e- |
| 05 | 0.253 CTCCCTG              |   |   |   |                |
| 1  | mm10_knownGene_uc009fpw.1  | 2 | 8 | + | 10.8143 9.74e- |
| 05 | 0.253 CTTCCCTG             |   |   |   |                |
| 1  | mm10_knownGene_uc008sky.1  | 2 | 8 | + | 10.8143 9.74e- |
| 05 | 0.253 CTCCCTG              |   |   |   |                |
| 1  | mm10_knownGene_uc029vnf.1  | 2 | 8 | + | 10.8143 9.74e- |
| 05 | 0.253 CTCCCTG              |   |   |   |                |
| 1  | mm10_knownGene_uc009szy.1  | 2 | 8 | + | 10.8143 9.74e- |
| 05 | 0.253 CTCCCTG              |   |   |   |                |
| 1  | mm10_knownGene_uc057aha.1  | 2 | 8 | + | 10.8143 9.74e- |
| 05 | 0.253 CTCCCTG              |   |   |   |                |
| 1  | mm10_knownGene_uc008smo.1  | 2 | 8 | + | 10.8143 9.74e- |
| 05 | 0.253 CTCCCTG              |   |   |   |                |
| 1  | mm10_knownGene_uc008rko.2  | 2 | 8 | + | 10.8143 9.74e- |
| 05 | 0.253 CTCCCTG              |   |   |   |                |
| 1  | mm10_knownGene_uc009tffi.1 | 3 | 9 | + | 10.8143 9.74e- |
| 05 | 0.253 CTCCCTG              |   |   |   |                |
| 1  | mm10_knownGene_uc008ldx.2  | 3 | 9 | + | 10.8143 9.74e- |
| 05 | 0.253 CTCCCTG              |   |   |   |                |
| 1  | mm10_knownGene_uc009aiz.1  | 3 | 9 | + | 10.8143 9.74e- |
| 05 | 0.253 CTTCCCTG             |   |   |   |                |
| 1  | mm10_knownGene_uc008xvf.2  | 3 | 9 | + | 10.8143 9.74e- |
| 05 | 0.253 CTTCCCTG             |   |   |   |                |
| 1  | mm10_knownGene_uc007cpf.2  | 3 | 9 | + | 10.8143 9.74e- |
| 05 | 0.253 CTCCCTG              |   |   |   |                |
| 1  | mm10_knownGene_uc008hbm.1  | 3 | 9 | + | 10.8143 9.74e- |
| 05 | 0.253 CTTCCCTG             |   |   |   |                |
| 1  | mm10_knownGene_uc029wgo.1  | 3 | 9 | + | 10.8143 9.74e- |
| 05 | 0.253 CTCCCTG              |   |   |   |                |
| 1  | mm10_knownGene_uc029tfn.1  | 3 | 9 | + | 10.8143 9.74e- |
| 05 | 0.253 CTCCCTG              |   |   |   |                |
| 1  | mm10_knownGene_uc029vfm.1  | 3 | 9 | + | 10.8143 9.74e- |
| 05 | 0.253 CTCCCTG              |   |   |   |                |
| 1  | mm10_knownGene_uc007qpc.1  | 3 | 9 | + | 10.8143 9.74e- |
| 05 | 0.253 CTCCCTG              |   |   |   |                |
| 1  | mm10_knownGene_uc007cpg.2  | 3 | 9 | + | 10.8143 9.74e- |
| 05 | 0.253 CTCCCTG              |   |   |   |                |
| 1  | mm10_knownGene_uc008sma.2  | 3 | 9 | + | 10.8143 9.74e- |
| 05 | 0.253 CTCCCTG              |   |   |   |                |
| 1  | mm10_knownGene_uc012dsf.1  | 3 | 9 | + | 10.8143 9.74e- |
| 05 | 0.253 CTTCCCTG             |   |   |   |                |
| 1  | mm10_knownGene_uc033geh.1  | 3 | 9 | + | 10.8143 9.74e- |
| 05 | 0.253 CTCCCTG              |   |   |   |                |
| 1  | mm10_knownGene_uc007cpe.2  | 3 | 9 | + | 10.8143 9.74e- |
| 05 | 0.253 CTCCCTG              |   |   |   |                |
| 1  | mm10_knownGene_uc012ado.1  | 3 | 9 | + | 10.8143 9.74e- |
| 05 | 0.253 CTTCCCTG             |   |   |   |                |
| 1  | mm10_knownGene_uc008gip.1  | 3 | 9 | + | 10.8143 9.74e- |
| 05 | 0.253 CTTCCCTG             |   |   |   |                |
| 1  | mm10_knownGene_uc008wlt.1  | 3 | 9 | + | 10.8143 9.74e- |
| 05 | 0.253 CTCCCTG              |   |   |   |                |
| 1  | mm10_knownGene_uc033geg.1  | 3 | 9 | + | 10.8143 9.74e- |
| 05 | 0.253 CTCCCTG              |   |   |   |                |
| 1  | mm10_knownGene_uc009qmk.2  | 3 | 9 | + | 10.8143 9.74e- |
| 05 | 0.253 CTTCCCTG             |   |   |   |                |
| 1  | mm10_knownGene_uc008wlp.1  | 3 | 9 | + | 10.8143 9.74e- |
| 05 | 0.253 CTCCCTG              |   |   |   |                |
| 1  | mm10_knownGene_uc008unu.1  | 3 | 9 | + | 10.8143 9.74e- |
| 05 | 0.253 CTTCCCTG             |   |   |   |                |
| 1  | mm10_knownGene_uc007oib.4  | 3 | 9 | + | 10.8143 9.74e- |
| 05 | 0.253 CTCCCTG              |   |   |   |                |

|    |                           |   |    |   |                |
|----|---------------------------|---|----|---|----------------|
| 1  | mm10_knownGene_uc008sif.1 | 3 | 9  | + | 10.8143 9.74e- |
| 05 | 0.253 CTTCCCTG            |   |    |   |                |
| 1  | mm10_knownGene_uc009azs.1 | 4 | 10 | + | 10.8143 9.74e- |
| 05 | 0.253 CTTCCCTG            |   |    |   |                |
| 1  | mm10_knownGene_uc009azt.1 | 4 | 10 | + | 10.8143 9.74e- |
| 05 | 0.253 CTTCCCTG            |   |    |   |                |
| 1  | mm10_knownGene_uc009aqs.2 | 4 | 10 | + | 10.8143 9.74e- |
| 05 | 0.253 CTTCCCTG            |   |    |   |                |
| 1  | mm10_knownGene_uc007flq.2 | 4 | 10 | + | 10.8143 9.74e- |
| 05 | 0.253 CTTCCCTG            |   |    |   |                |
| 1  | mm10_knownGene_uc011xfn.2 | 4 | 10 | + | 10.8143 9.74e- |
| 05 | 0.253 CTTCCCTG            |   |    |   |                |
| 1  | mm10_knownGene_uc009pqn.1 | 4 | 10 | + | 10.8143 9.74e- |
| 05 | 0.253 CTCCCTG             |   |    |   |                |
| 1  | mm10_knownGene_uc009gsd.1 | 4 | 10 | + | 10.8143 9.74e- |
| 05 | 0.253 CTCCCTG             |   |    |   |                |
| 1  | mm10_knownGene_uc007wcg.2 | 4 | 10 | + | 10.8143 9.74e- |
| 05 | 0.253 CTCCCTG             |   |    |   |                |
| 1  | mm10_knownGene_uc009duy.1 | 4 | 10 | + | 10.8143 9.74e- |
| 05 | 0.253 CTCCCTG             |   |    |   |                |
| 1  | mm10_knownGene_uc029smx.1 | 4 | 10 | + | 10.8143 9.74e- |
| 05 | 0.253 CTTCCCTG            |   |    |   |                |
| 1  | mm10_knownGene_uc033hen.1 | 5 | 11 | + | 10.8143 9.74e- |
| 05 | 0.253 CTTCCCTG            |   |    |   |                |
| 1  | mm10_knownGene_uc008bdb.1 | 5 | 11 | + | 10.8143 9.74e- |
| 05 | 0.253 CTTCCCTG            |   |    |   |                |
| 1  | mm10_knownGene_uc008kjq.1 | 5 | 11 | + | 10.8143 9.74e- |
| 05 | 0.253 CTTCCCTG            |   |    |   |                |
| 1  | mm10_knownGene_uc009hmz.2 | 5 | 11 | + | 10.8143 9.74e- |
| 05 | 0.253 CTTCCCTG            |   |    |   |                |
| 1  | mm10_knownGene_uc007nxr.1 | 5 | 11 | + | 10.8143 9.74e- |
| 05 | 0.253 CTTCCCTG            |   |    |   |                |
| 1  | mm10_knownGene_uc029rco.1 | 5 | 11 | + | 10.8143 9.74e- |
| 05 | 0.253 CTCCCTG             |   |    |   |                |
| 1  | mm10_knownGene_uc009mbr.2 | 6 | 12 | + | 10.8143 9.74e- |
| 05 | 0.253 CTCCCTG             |   |    |   |                |
| 1  | mm10_knownGene_uc007gtm.1 | 6 | 12 | + | 10.8143 9.74e- |
| 05 | 0.253 CTTCCCTG            |   |    |   |                |
| 1  | mm10_knownGene_uc008fqj.1 | 6 | 12 | + | 10.8143 9.74e- |
| 05 | 0.253 CTCCCTG             |   |    |   |                |
| 1  | mm10_knownGene_uc008auo.1 | 6 | 12 | + | 10.8143 9.74e- |
| 05 | 0.253 CTCCCTG             |   |    |   |                |
| 1  | mm10_knownGene_uc007wtc.1 | 6 | 12 | + | 10.8143 9.74e- |
| 05 | 0.253 CTCCCTG             |   |    |   |                |
| 1  | mm10_knownGene_uc009fse.1 | 6 | 12 | + | 10.8143 9.74e- |
| 05 | 0.253 CTCCCTG             |   |    |   |                |
| 1  | mm10_knownGene_uc008aum.1 | 6 | 12 | + | 10.8143 9.74e- |
| 05 | 0.253 CTCCCTG             |   |    |   |                |
| 1  | mm10_knownGene_uc009bio.2 | 6 | 12 | + | 10.8143 9.74e- |
| 05 | 0.253 CTCCCTG             |   |    |   |                |
| 1  | mm10_knownGene_uc012czm.1 | 6 | 12 | + | 10.8143 9.74e- |
| 05 | 0.253 CTCCCTG             |   |    |   |                |
| 1  | mm10_knownGene_uc011wpg.1 | 6 | 12 | + | 10.8143 9.74e- |
| 05 | 0.253 CTTCCCTG            |   |    |   |                |
| 1  | mm10_knownGene_uc012glc.1 | 6 | 12 | + | 10.8143 9.74e- |
| 05 | 0.253 CTCCCTG             |   |    |   |                |
| 1  | mm10_knownGene_uc009nnq.1 | 6 | 12 | + | 10.8143 9.74e- |
| 05 | 0.253 CTCCCTG             |   |    |   |                |
| 1  | mm10_knownGene_uc009iwd.1 | 6 | 12 | + | 10.8143 9.74e- |
| 05 | 0.253 CTTCCCTG            |   |    |   |                |
| 1  | mm10_knownGene_uc009bpr.4 | 6 | 12 | + | 10.8143 9.74e- |
| 05 | 0.253 CTCCCTG             |   |    |   |                |

|    |                           |   |    |   |                |
|----|---------------------------|---|----|---|----------------|
| 1  | mm10_knownGene_uc007wtb.1 | 6 | 12 | + | 10.8143 9.74e- |
| 05 | 0.253 CTCCCTG             |   |    |   |                |
| 1  | mm10_knownGene_uc008bfi.2 | 6 | 12 | + | 10.8143 9.74e- |
| 05 | 0.253 CTTCCCTG            |   |    |   |                |
| 1  | mm10_knownGene_uc057car.1 | 6 | 12 | + | 10.8143 9.74e- |
| 05 | 0.253 CTTCCCTG            |   |    |   |                |
| 1  | mm10_knownGene_uc012gfi.1 | 6 | 12 | + | 10.8143 9.74e- |
| 05 | 0.253 CTCCCTG             |   |    |   |                |
| 1  | mm10_knownGene_uc056yvx.1 | 6 | 12 | + | 10.8143 9.74e- |
| 05 | 0.253 CTTCCCTG            |   |    |   |                |
| 1  | mm10_knownGene_uc033foa.1 | 6 | 12 | + | 10.8143 9.74e- |
| 05 | 0.253 CTTCCCTG            |   |    |   |                |
| 1  | mm10_knownGene_uc007cal.1 | 6 | 12 | + | 10.8143 9.74e- |
| 05 | 0.253 CTTCCCTG            |   |    |   |                |
| 1  | mm10_knownGene_uc008lat.1 | 6 | 12 | + | 10.8143 9.74e- |
| 05 | 0.253 CTTCCCTG            |   |    |   |                |
| 1  | mm10_knownGene_uc007gzl.1 | 6 | 12 | + | 10.8143 9.74e- |
| 05 | 0.253 CTTCCCTG            |   |    |   |                |
| 1  | mm10_knownGene_uc007cak.1 | 6 | 12 | + | 10.8143 9.74e- |
| 05 | 0.253 CTTCCCTG            |   |    |   |                |
| 1  | mm10_knownGene_uc009nnp.1 | 6 | 12 | + | 10.8143 9.74e- |
| 05 | 0.253 CTCCCTG             |   |    |   |                |
| 1  | mm10_knownGene_uc029xmo.1 | 6 | 12 | + | 10.8143 9.74e- |
| 05 | 0.253 CTTCCCTG            |   |    |   |                |
| 1  | mm10_knownGene_uc012ebj.1 | 6 | 12 | + | 10.8143 9.74e- |
| 05 | 0.253 CTTCCCTG            |   |    |   |                |
| 1  | mm10_knownGene_uc007cam.1 | 6 | 12 | + | 10.8143 9.74e- |
| 05 | 0.253 CTTCCCTG            |   |    |   |                |
| 1  | mm10_knownGene_uc029tlq.1 | 6 | 12 | + | 10.8143 9.74e- |
| 05 | 0.253 CTTCCCTG            |   |    |   |                |
| 1  | mm10_knownGene_uc009ntu.1 | 6 | 12 | + | 10.8143 9.74e- |
| 05 | 0.253 CTTCCCTG            |   |    |   |                |
| 1  | mm10_knownGene_uc007gtl.1 | 6 | 12 | + | 10.8143 9.74e- |
| 05 | 0.253 CTTCCCTG            |   |    |   |                |
| 1  | mm10_knownGene_uc033hpj.1 | 6 | 12 | + | 10.8143 9.74e- |
| 05 | 0.253 CTTCCCTG            |   |    |   |                |
| 1  | mm10_knownGene_uc057caq.1 | 6 | 12 | + | 10.8143 9.74e- |
| 05 | 0.253 CTTCCCTG            |   |    |   |                |
| 1  | mm10_knownGene_uc007hin.1 | 1 | 7  | - | 10.8143 9.74e- |
| 05 | 0.253 CTTCCCTG            |   |    |   |                |
| 1  | mm10_knownGene_uc007qkx.2 | 1 | 7  | - | 10.8143 9.74e- |
| 05 | 0.253 CTTCCCTG            |   |    |   |                |
| 1  | mm10_knownGene_uc007qrb.2 | 7 | 13 | + | 10.8143 9.74e- |
| 05 | 0.253 CTCCCTG             |   |    |   |                |
| 1  | mm10_knownGene_uc007mra.1 | 1 | 7  | - | 10.8143 9.74e- |
| 05 | 0.253 CTTCCCTG            |   |    |   |                |
| 1  | mm10_knownGene_uc008sgb.2 | 7 | 13 | + | 10.8143 9.74e- |
| 05 | 0.253 CTCCCTG             |   |    |   |                |
| 1  | mm10_knownGene_uc007hml.1 | 7 | 13 | + | 10.8143 9.74e- |
| 05 | 0.253 CTCCCTG             |   |    |   |                |
| 1  | mm10_knownGene_uc008pgo.2 | 7 | 13 | + | 10.8143 9.74e- |
| 05 | 0.253 CTCCCTG             |   |    |   |                |
| 1  | mm10_knownGene_uc029wqt.1 | 1 | 7  | - | 10.8143 9.74e- |
| 05 | 0.253 CTTCCCTG            |   |    |   |                |
| 1  | mm10_knownGene_uc009awb.1 | 1 | 7  | - | 10.8143 9.74e- |
| 05 | 0.253 CTTCCCTG            |   |    |   |                |
| 1  | mm10_knownGene_uc029uzl.1 | 1 | 7  | - | 10.8143 9.74e- |
| 05 | 0.253 CTTCCCTG            |   |    |   |                |
| 1  | mm10_knownGene_uc029ubx.1 | 1 | 7  | - | 10.8143 9.74e- |
| 05 | 0.253 CTCCCTG             |   |    |   |                |
| 1  | mm10_knownGene_uc029xcr.1 | 1 | 7  | - | 10.8143 9.74e- |
| 05 | 0.253 CTTCCCTG            |   |    |   |                |

|    |                           |   |    |   |                |
|----|---------------------------|---|----|---|----------------|
| 1  | mm10_knownGene_uc007hio.1 | 1 | 7  | - | 10.8143 9.74e- |
| 05 | 0.253 CTTCCTG             |   |    |   |                |
| 1  | mm10_knownGene_uc009cld.1 | 1 | 7  | - | 10.8143 9.74e- |
| 05 | 0.253 CTTCCTG             |   |    |   |                |
| 1  | mm10_knownGene_uc012dbn.1 | 7 | 13 | + | 10.8143 9.74e- |
| 05 | 0.253 CTCCCTG             |   |    |   |                |
| 1  | mm10_knownGene_uc033jdn.1 | 1 | 7  | - | 10.8143 9.74e- |
| 05 | 0.253 CTTCCTG             |   |    |   |                |
| 1  | mm10_knownGene_uc008pgn.2 | 7 | 13 | + | 10.8143 9.74e- |
| 05 | 0.253 CTCCCTG             |   |    |   |                |
| 1  | mm10_knownGene_uc029wdw.1 | 7 | 13 | + | 10.8143 9.74e- |
| 05 | 0.253 CTTCCTG             |   |    |   |                |
| 1  | mm10_knownGene_uc029rzp.1 | 1 | 7  | - | 10.8143 9.74e- |
| 05 | 0.253 CTTCCTG             |   |    |   |                |
| 1  | mm10_knownGene_uc008img.1 | 1 | 7  | - | 10.8143 9.74e- |
| 05 | 0.253 CTTCCTG             |   |    |   |                |
| 1  | mm10_knownGene_uc008oxy.1 | 7 | 13 | + | 10.8143 9.74e- |
| 05 | 0.253 CTTCCTG             |   |    |   |                |
| 1  | mm10_knownGene_uc007cre.1 | 1 | 7  | - | 10.8143 9.74e- |
| 05 | 0.253 CTCCCTG             |   |    |   |                |
| 1  | mm10_knownGene_uc007ihp.1 | 1 | 7  | - | 10.8143 9.74e- |
| 05 | 0.253 CTTCCTG             |   |    |   |                |
| 1  | mm10_knownGene_uc009laz.1 | 1 | 7  | - | 10.8143 9.74e- |
| 05 | 0.253 CTTCCTG             |   |    |   |                |
| 1  | mm10_knownGene_uc008pgr.2 | 7 | 13 | + | 10.8143 9.74e- |
| 05 | 0.253 CTCCCTG             |   |    |   |                |
| 1  | mm10_knownGene_uc007hil.1 | 1 | 7  | - | 10.8143 9.74e- |
| 05 | 0.253 CTTCCTG             |   |    |   |                |
| 1  | mm10_knownGene_uc008pgq.2 | 7 | 13 | + | 10.8143 9.74e- |
| 05 | 0.253 CTCCCTG             |   |    |   |                |
| 1  | mm10_knownGene_uc007usr.1 | 1 | 7  | - | 10.8143 9.74e- |
| 05 | 0.253 CTTCCTG             |   |    |   |                |
| 1  | mm10_knownGene_uc012cpr.1 | 7 | 13 | + | 10.8143 9.74e- |
| 05 | 0.253 CTCCCTG             |   |    |   |                |
| 1  | mm10_knownGene_uc007nue.1 | 7 | 13 | + | 10.8143 9.74e- |
| 05 | 0.253 CTTCCTG             |   |    |   |                |
| 1  | mm10_knownGene_uc008nqr.2 | 1 | 7  | - | 10.8143 9.74e- |
| 05 | 0.253 CTTCCTG             |   |    |   |                |
| 1  | mm10_knownGene_uc009clc.1 | 1 | 7  | - | 10.8143 9.74e- |
| 05 | 0.253 CTTCCTG             |   |    |   |                |
| 1  | mm10_knownGene_uc011xio.1 | 1 | 7  | - | 10.8143 9.74e- |
| 05 | 0.253 CTCCCTG             |   |    |   |                |
| 1  | mm10_knownGene_uc029xnr.1 | 7 | 13 | + | 10.8143 9.74e- |
| 05 | 0.253 CTTCCTG             |   |    |   |                |
| 1  | mm10_knownGene_uc008yyf.2 | 1 | 7  | - | 10.8143 9.74e- |
| 05 | 0.253 CTCCCTG             |   |    |   |                |
| 1  | mm10_knownGene_uc029wrl.1 | 1 | 7  | - | 10.8143 9.74e- |
| 05 | 0.253 CTTCCTG             |   |    |   |                |
| 1  | mm10_knownGene_uc029sai.1 | 1 | 7  | - | 10.8143 9.74e- |
| 05 | 0.253 CTCCCTG             |   |    |   |                |
| 1  | mm10_knownGene_uc007hmm.1 | 7 | 13 | + | 10.8143 9.74e- |
| 05 | 0.253 CTCCCTG             |   |    |   |                |
| 1  | mm10_knownGene_uc029tam.1 | 1 | 7  | - | 10.8143 9.74e- |
| 05 | 0.253 CTTCCTG             |   |    |   |                |
| 1  | mm10_knownGene_uc029tdm.1 | 1 | 7  | - | 10.8143 9.74e- |
| 05 | 0.253 CTCCCTG             |   |    |   |                |
| 1  | mm10_knownGene_uc009thv.2 | 1 | 7  | - | 10.8143 9.74e- |
| 05 | 0.253 CTTCCTG             |   |    |   |                |
| 1  | mm10_knownGene_uc029ucl.1 | 1 | 7  | - | 10.8143 9.74e- |
| 05 | 0.253 CTCCCTG             |   |    |   |                |
| 1  | mm10_knownGene_uc007chn.2 | 1 | 7  | - | 10.8143 9.74e- |
| 05 | 0.253 CTCCCTG             |   |    |   |                |

|    |                           |   |    |   |                |
|----|---------------------------|---|----|---|----------------|
| 1  | mm10_knownGene_uc009cle.1 | 1 | 7  | - | 10.8143 9.74e- |
| 05 | 0.253 CTTCCCTG            |   |    |   |                |
| 1  | mm10_knownGene_uc007gcj.2 | 1 | 7  | - | 10.8143 9.74e- |
| 05 | 0.253 CTCCCTG             |   |    |   |                |
| 1  | mm10_knownGene_uc007him.1 | 1 | 7  | - | 10.8143 9.74e- |
| 05 | 0.253 CTTCCCTG            |   |    |   |                |
| 1  | mm10_knownGene_uc008pgp.2 | 7 | 13 | + | 10.8143 9.74e- |
| 05 | 0.253 CTCCCTG             |   |    |   |                |
| 1  | mm10_knownGene_uc009gpk.1 | 7 | 13 | + | 10.8143 9.74e- |
| 05 | 0.253 CTTCCCTG            |   |    |   |                |
| 1  | mm10_knownGene_uc012cpq.1 | 7 | 13 | + | 10.8143 9.74e- |
| 05 | 0.253 CTCCCTG             |   |    |   |                |
| 1  | mm10_knownGene_uc008ryt.1 | 1 | 7  | - | 10.8143 9.74e- |
| 05 | 0.253 CTCCCTG             |   |    |   |                |
| 1  | mm10_knownGene_uc008iut.1 | 2 | 8  | - | 10.8143 9.74e- |
| 05 | 0.253 CTTCCCTG            |   |    |   |                |
| 1  | mm10_knownGene_uc008wnp.2 | 8 | 14 | + | 10.8143 9.74e- |
| 05 | 0.253 CTCCCTG             |   |    |   |                |
| 1  | mm10_knownGene_uc029tfv.1 | 8 | 14 | + | 10.8143 9.74e- |
| 05 | 0.253 CTCCCTG             |   |    |   |                |
| 1  | mm10_knownGene_uc012akw.1 | 2 | 8  | - | 10.8143 9.74e- |
| 05 | 0.253 CTCCCTG             |   |    |   |                |
| 1  | mm10_knownGene_uc029vuy.2 | 8 | 14 | + | 10.8143 9.74e- |
| 05 | 0.253 CTCCCTG             |   |    |   |                |
| 1  | mm10_knownGene_uc029uca.1 | 2 | 8  | - | 10.8143 9.74e- |
| 05 | 0.253 CTCCCTG             |   |    |   |                |
| 1  | mm10_knownGene_uc012djj.1 | 2 | 8  | - | 10.8143 9.74e- |
| 05 | 0.253 CTTCCCTG            |   |    |   |                |
| 1  | mm10_knownGene_uc008xvz.2 | 8 | 14 | + | 10.8143 9.74e- |
| 05 | 0.253 CTCCCTG             |   |    |   |                |
| 1  | mm10_knownGene_uc008bza.2 | 8 | 14 | + | 10.8143 9.74e- |
| 05 | 0.253 CTTCCCTG            |   |    |   |                |
| 1  | mm10_knownGene_uc029txy.1 | 8 | 14 | + | 10.8143 9.74e- |
| 05 | 0.253 CTCCCTG             |   |    |   |                |
| 1  | mm10_knownGene_uc029qxw.1 | 8 | 14 | + | 10.8143 9.74e- |
| 05 | 0.253 CTTCCCTG            |   |    |   |                |
| 1  | mm10_knownGene_uc007emg.1 | 2 | 8  | - | 10.8143 9.74e- |
| 05 | 0.253 CTTCCCTG            |   |    |   |                |
| 1  | mm10_knownGene_uc008wnq.2 | 8 | 14 | + | 10.8143 9.74e- |
| 05 | 0.253 CTCCCTG             |   |    |   |                |
| 1  | mm10_knownGene_uc009frb.1 | 2 | 8  | - | 10.8143 9.74e- |
| 05 | 0.253 CTTCCCTG            |   |    |   |                |
| 1  | mm10_knownGene_uc009tbi.1 | 8 | 14 | + | 10.8143 9.74e- |
| 05 | 0.253 CTTCCCTG            |   |    |   |                |
| 1  | mm10_knownGene_uc008hln.1 | 8 | 14 | + | 10.8143 9.74e- |
| 05 | 0.253 CTTCCCTG            |   |    |   |                |
| 1  | mm10_knownGene_uc007xfc.1 | 2 | 8  | - | 10.8143 9.74e- |
| 05 | 0.253 CTTCCCTG            |   |    |   |                |
| 1  | mm10_knownGene_uc008aou.2 | 2 | 8  | - | 10.8143 9.74e- |
| 05 | 0.253 CTCCCTG             |   |    |   |                |
| 1  | mm10_knownGene_uc011zxr.1 | 2 | 8  | - | 10.8143 9.74e- |
| 05 | 0.253 CTTCCCTG            |   |    |   |                |
| 1  | mm10_knownGene_uc007bnq.1 | 8 | 14 | + | 10.8143 9.74e- |
| 05 | 0.253 CTTCCCTG            |   |    |   |                |
| 1  | mm10_knownGene_uc012akx.1 | 2 | 8  | - | 10.8143 9.74e- |
| 05 | 0.253 CTCCCTG             |   |    |   |                |
| 1  | mm10_knownGene_uc009cdk.1 | 8 | 14 | + | 10.8143 9.74e- |
| 05 | 0.253 CTCCCTG             |   |    |   |                |
| 1  | mm10_knownGene_uc007xfd.1 | 2 | 8  | - | 10.8143 9.74e- |
| 05 | 0.253 CTTCCCTG            |   |    |   |                |
| 1  | mm10_knownGene_uc011znp.1 | 8 | 14 | + | 10.8143 9.74e- |
| 05 | 0.253 CTTCCCTG            |   |    |   |                |



|    |                           |   |    |   |                |
|----|---------------------------|---|----|---|----------------|
| 1  | mm10_knownGene_uc009uoi.1 | 2 | 8  | - | 10.8143 9.74e- |
| 05 | 0.253 CTTCCTG             |   |    |   |                |
| 1  | mm10_knownGene_uc008aot.2 | 2 | 8  | - | 10.8143 9.74e- |
| 05 | 0.253 CTCCCTG             |   |    |   |                |
| 1  | mm10_knownGene_uc007vds.1 | 3 | 9  | - | 10.8143 9.74e- |
| 05 | 0.253 CTTCCTG             |   |    |   |                |
| 1  | mm10_knownGene_uc009tsy.2 | 3 | 9  | - | 10.8143 9.74e- |
| 05 | 0.253 CTTCCTG             |   |    |   |                |
| 1  | mm10_knownGene_uc008gtq.1 | 3 | 9  | - | 10.8143 9.74e- |
| 05 | 0.253 CTCCCTG             |   |    |   |                |
| 1  | mm10_knownGene_uc009muj.1 | 3 | 9  | - | 10.8143 9.74e- |
| 05 | 0.253 CTCCCTG             |   |    |   |                |
| 1  | mm10_knownGene_uc009lax.3 | 3 | 9  | - | 10.8143 9.74e- |
| 05 | 0.253 CTTCCTG             |   |    |   |                |
| 1  | mm10_knownGene_uc029yhl.1 | 3 | 9  | - | 10.8143 9.74e- |
| 05 | 0.253 CTTCCTG             |   |    |   |                |
| 1  | mm10_knownGene_uc009aeh.2 | 9 | 15 | + | 10.8143 9.74e- |
| 05 | 0.253 CTCCCTG             |   |    |   |                |
| 1  | mm10_knownGene_uc033gkk.1 | 3 | 9  | - | 10.8143 9.74e- |
| 05 | 0.253 CTCCCTG             |   |    |   |                |
| 1  | mm10_knownGene_uc012cbl.1 | 3 | 9  | - | 10.8143 9.74e- |
| 05 | 0.253 CTTCCTG             |   |    |   |                |
| 1  | mm10_knownGene_uc008lqf.1 | 9 | 15 | + | 10.8143 9.74e- |
| 05 | 0.253 CTTCCTG             |   |    |   |                |
| 1  | mm10_knownGene_uc009mpa.2 | 3 | 9  | - | 10.8143 9.74e- |
| 05 | 0.253 CTCCCTG             |   |    |   |                |
| 1  | mm10_knownGene_uc008ull.2 | 9 | 15 | + | 10.8143 9.74e- |
| 05 | 0.253 CTTCCTG             |   |    |   |                |
| 1  | mm10_knownGene_uc007hts.2 | 9 | 15 | + | 10.8143 9.74e- |
| 05 | 0.253 CTCCCTG             |   |    |   |                |
| 1  | mm10_knownGene_uc007wfr.2 | 9 | 15 | + | 10.8143 9.74e- |
| 05 | 0.253 CTCCCTG             |   |    |   |                |
| 1  | mm10_knownGene_uc033gzq.1 | 3 | 9  | - | 10.8143 9.74e- |
| 05 | 0.253 CTTCCTG             |   |    |   |                |
| 1  | mm10_knownGene_uc011yxf.1 | 3 | 9  | - | 10.8143 9.74e- |
| 05 | 0.253 CTCCCTG             |   |    |   |                |
| 1  | mm10_knownGene_uc009iwk.3 | 9 | 15 | + | 10.8143 9.74e- |
| 05 | 0.253 CTCCCTG             |   |    |   |                |
| 1  | mm10_knownGene_uc029xlp.1 | 3 | 9  | - | 10.8143 9.74e- |
| 05 | 0.253 CTTCCTG             |   |    |   |                |
| 1  | mm10_knownGene_uc009iwj.3 | 9 | 15 | + | 10.8143 9.74e- |
| 05 | 0.253 CTCCCTG             |   |    |   |                |
| 1  | mm10_knownGene_uc009rmb.1 | 3 | 9  | - | 10.8143 9.74e- |
| 05 | 0.253 CTTCCTG             |   |    |   |                |
| 1  | mm10_knownGene_uc007ptu.1 | 3 | 9  | - | 10.8143 9.74e- |
| 05 | 0.253 CTCCCTG             |   |    |   |                |
| 1  | mm10_knownGene_uc009htt.1 | 3 | 9  | - | 10.8143 9.74e- |
| 05 | 0.253 CTTCCTG             |   |    |   |                |
| 1  | mm10_knownGene_uc012gho.1 | 3 | 9  | - | 10.8143 9.74e- |
| 05 | 0.253 CTCCCTG             |   |    |   |                |
| 1  | mm10_knownGene_uc033fth.1 | 3 | 9  | - | 10.8143 9.74e- |
| 05 | 0.253 CTCCCTG             |   |    |   |                |
| 1  | mm10_knownGene_uc029tmz.1 | 9 | 15 | + | 10.8143 9.74e- |
| 05 | 0.253 CTTCCTG             |   |    |   |                |
| 1  | mm10_knownGene_uc007eos.2 | 9 | 15 | + | 10.8143 9.74e- |
| 05 | 0.253 CTTCCTG             |   |    |   |                |
| 1  | mm10_knownGene_uc007cej.1 | 3 | 9  | - | 10.8143 9.74e- |
| 05 | 0.253 CTTCCTG             |   |    |   |                |
| 1  | mm10_knownGene_uc029tqf.3 | 9 | 15 | + | 10.8143 9.74e- |
| 05 | 0.253 CTCCCTG             |   |    |   |                |
| 1  | mm10_knownGene_uc008lsn.1 | 3 | 9  | - | 10.8143 9.74e- |
| 05 | 0.253 CTTCCTG             |   |    |   |                |

|    |                           |    |    |   |                |
|----|---------------------------|----|----|---|----------------|
| 1  | mm10_knownGene_uc007weq.2 | 9  | 15 | + | 10.8143 9.74e- |
| 05 | 0.253 CTTCCCTG            |    |    |   |                |
| 1  | mm10_knownGene_uc012ghe.1 | 9  | 15 | + | 10.8143 9.74e- |
| 05 | 0.253 CTTCCCTG            |    |    |   |                |
| 1  | mm10_knownGene_uc009eqo.1 | 10 | 16 | + | 10.8143 9.74e- |
| 05 | 0.253 CTTCCCTG            |    |    |   |                |
| 1  | mm10_knownGene_uc007rmc.2 | 10 | 16 | + | 10.8143 9.74e- |
| 05 | 0.253 CTCCCTG             |    |    |   |                |
| 1  | mm10_knownGene_uc007pvh.1 | 4  | 10 | - | 10.8143 9.74e- |
| 05 | 0.253 CTTCCCTG            |    |    |   |                |
| 1  | mm10_knownGene_uc008pqz.1 | 4  | 10 | - | 10.8143 9.74e- |
| 05 | 0.253 CTTCCCTG            |    |    |   |                |
| 1  | mm10_knownGene_uc029qyc.1 | 4  | 10 | - | 10.8143 9.74e- |
| 05 | 0.253 CTCCCTG             |    |    |   |                |
| 1  | mm10_knownGene_uc009rmn.1 | 10 | 16 | + | 10.8143 9.74e- |
| 05 | 0.253 CTCCCTG             |    |    |   |                |
| 1  | mm10_knownGene_uc008yyv.1 | 10 | 16 | + | 10.8143 9.74e- |
| 05 | 0.253 CTTCCCTG            |    |    |   |                |
| 1  | mm10_knownGene_uc007rtd.2 | 4  | 10 | - | 10.8143 9.74e- |
| 05 | 0.253 CTTCCCTG            |    |    |   |                |
| 1  | mm10_knownGene_uc008iov.2 | 4  | 10 | - | 10.8143 9.74e- |
| 05 | 0.253 CTCCCTG             |    |    |   |                |
| 1  | mm10_knownGene_uc008fsy.2 | 4  | 10 | - | 10.8143 9.74e- |
| 05 | 0.253 CTTCCCTG            |    |    |   |                |
| 1  | mm10_knownGene_uc009pow.2 | 10 | 16 | + | 10.8143 9.74e- |
| 05 | 0.253 CTTCCCTG            |    |    |   |                |
| 1  | mm10_knownGene_uc008lep.2 | 4  | 10 | - | 10.8143 9.74e- |
| 05 | 0.253 CTCCCTG             |    |    |   |                |
| 1  | mm10_knownGene_uc008ksv.2 | 10 | 16 | + | 10.8143 9.74e- |
| 05 | 0.253 CTTCCCTG            |    |    |   |                |
| 1  | mm10_knownGene_uc057bd1.1 | 10 | 16 | + | 10.8143 9.74e- |
| 05 | 0.253 CTTCCCTG            |    |    |   |                |
| 1  | mm10_knownGene_uc007rtb.2 | 4  | 10 | - | 10.8143 9.74e- |
| 05 | 0.253 CTTCCCTG            |    |    |   |                |
| 1  | mm10_knownGene_uc008xwd.2 | 10 | 16 | + | 10.8143 9.74e- |
| 05 | 0.253 CTTCCCTG            |    |    |   |                |
| 1  | mm10_knownGene_uc008lez.2 | 4  | 10 | - | 10.8143 9.74e- |
| 05 | 0.253 CTCCCTG             |    |    |   |                |
| 1  | mm10_knownGene_uc009rjg.1 | 4  | 10 | - | 10.8143 9.74e- |
| 05 | 0.253 CTCCCTG             |    |    |   |                |
| 1  | mm10_knownGene_uc009npe.1 | 10 | 16 | + | 10.8143 9.74e- |
| 05 | 0.253 CTTCCCTG            |    |    |   |                |
| 1  | mm10_knownGene_uc007jad.2 | 10 | 16 | + | 10.8143 9.74e- |
| 05 | 0.253 CTCCCTG             |    |    |   |                |
| 1  | mm10_knownGene_uc056zap.1 | 10 | 16 | + | 10.8143 9.74e- |
| 05 | 0.253 CTCCCTG             |    |    |   |                |
| 1  | mm10_knownGene_uc033ifm.1 | 4  | 10 | - | 10.8143 9.74e- |
| 05 | 0.253 CTTCCCTG            |    |    |   |                |
| 1  | mm10_knownGene_uc007jkj.1 | 10 | 16 | + | 10.8143 9.74e- |
| 05 | 0.253 CTCCCTG             |    |    |   |                |
| 1  | mm10_knownGene_uc008xwc.2 | 10 | 16 | + | 10.8143 9.74e- |
| 05 | 0.253 CTTCCCTG            |    |    |   |                |
| 1  | mm10_knownGene_uc007rtc.2 | 4  | 10 | - | 10.8143 9.74e- |
| 05 | 0.253 CTTCCCTG            |    |    |   |                |
| 1  | mm10_knownGene_uc008uyh.2 | 4  | 10 | - | 10.8143 9.74e- |
| 05 | 0.253 CTTCCCTG            |    |    |   |                |
| 1  | mm10_knownGene_uc007rmd.2 | 10 | 16 | + | 10.8143 9.74e- |
| 05 | 0.253 CTCCCTG             |    |    |   |                |
| 1  | mm10_knownGene_uc007fsw.2 | 4  | 10 | - | 10.8143 9.74e- |
| 05 | 0.253 CTCCCTG             |    |    |   |                |
| 1  | mm10_knownGene_uc008qpg.1 | 4  | 10 | - | 10.8143 9.74e- |
| 05 | 0.253 CTTCCCTG            |    |    |   |                |

|    |                           |    |    |   |                |
|----|---------------------------|----|----|---|----------------|
| 1  | mm10_knownGene_uc009ufn.1 | 5  | 11 | - | 10.8143 9.74e- |
| 05 | 0.253 CTTCCCTG            |    |    |   |                |
| 1  | mm10_knownGene_uc008fta.2 | 5  | 11 | - | 10.8143 9.74e- |
| 05 | 0.253 CTTCCCTG            |    |    |   |                |
| 1  | mm10_knownGene_uc011zds.1 | 11 | 17 | + | 10.8143 9.74e- |
| 05 | 0.253 CTTCCCTG            |    |    |   |                |
| 1  | mm10_knownGene_uc009mdb.2 | 5  | 11 | - | 10.8143 9.74e- |
| 05 | 0.253 CTTCCCTG            |    |    |   |                |
| 1  | mm10_knownGene_uc007kva.2 | 11 | 17 | + | 10.8143 9.74e- |
| 05 | 0.253 CTTCCCTG            |    |    |   |                |
| 1  | mm10_knownGene_uc007npb.1 | 11 | 17 | + | 10.8143 9.74e- |
| 05 | 0.253 CTTCCCTG            |    |    |   |                |
| 1  | mm10_knownGene_uc009hdb.3 | 11 | 17 | + | 10.8143 9.74e- |
| 05 | 0.253 CTTCCCTG            |    |    |   |                |
| 1  | mm10_knownGene_uc029qtb.1 | 11 | 17 | + | 10.8143 9.74e- |
| 05 | 0.253 CTTCCCTG            |    |    |   |                |
| 1  | mm10_knownGene_uc033fvf.1 | 11 | 17 | + | 10.8143 9.74e- |
| 05 | 0.253 CTTCCCTG            |    |    |   |                |
| 1  | mm10_knownGene_uc011zxd.1 | 5  | 11 | - | 10.8143 9.74e- |
| 05 | 0.253 CTTCCCTG            |    |    |   |                |
| 1  | mm10_knownGene_uc008zfx.4 | 5  | 11 | - | 10.8143 9.74e- |
| 05 | 0.253 CTTCCCTG            |    |    |   |                |
| 1  | mm10_knownGene_uc012flh.2 | 11 | 17 | + | 10.8143 9.74e- |
| 05 | 0.253 CTTCCCTG            |    |    |   |                |
| 1  | mm10_knownGene_uc009mii.1 | 5  | 11 | - | 10.8143 9.74e- |
| 05 | 0.253 CTCCCTG             |    |    |   |                |
| 1  | mm10_knownGene_uc012bjx.1 | 5  | 11 | - | 10.8143 9.74e- |
| 05 | 0.253 CTTCCCTG            |    |    |   |                |
| 1  | mm10_knownGene_uc029vye.1 | 5  | 11 | - | 10.8143 9.74e- |
| 05 | 0.253 CTCCCTG             |    |    |   |                |
| 1  | mm10_knownGene_uc009rhb.2 | 5  | 11 | - | 10.8143 9.74e- |
| 05 | 0.253 CTTCCCTG            |    |    |   |                |
| 1  | mm10_knownGene_uc012esq.1 | 11 | 17 | + | 10.8143 9.74e- |
| 05 | 0.253 CTTCCCTG            |    |    |   |                |
| 1  | mm10_knownGene_uc033ijt.1 | 11 | 17 | + | 10.8143 9.74e- |
| 05 | 0.253 CTCCCTG             |    |    |   |                |
| 1  | mm10_knownGene_uc007lgm.1 | 5  | 11 | - | 10.8143 9.74e- |
| 05 | 0.253 CTTCCCTG            |    |    |   |                |
| 1  | mm10_knownGene_uc007rqo.1 | 11 | 17 | + | 10.8143 9.74e- |
| 05 | 0.253 CTTCCCTG            |    |    |   |                |
| 1  | mm10_knownGene_uc029syd.1 | 5  | 11 | - | 10.8143 9.74e- |
| 05 | 0.253 CTTCCCTG            |    |    |   |                |
| 1  | mm10_knownGene_uc007rqn.1 | 11 | 17 | + | 10.8143 9.74e- |
| 05 | 0.253 CTTCCCTG            |    |    |   |                |
| 1  | mm10_knownGene_uc008spq.2 | 11 | 17 | + | 10.8143 9.74e- |
| 05 | 0.253 CTCCCTG             |    |    |   |                |
| 1  | mm10_knownGene_uc009ckv.2 | 11 | 17 | + | 10.8143 9.74e- |
| 05 | 0.253 CTTCCCTG            |    |    |   |                |
| 1  | mm10_knownGene_uc009sbe.2 | 11 | 17 | + | 10.8143 9.74e- |
| 05 | 0.253 CTCCCTG             |    |    |   |                |
| 1  | mm10_knownGene_uc007fff.1 | 11 | 17 | + | 10.8143 9.74e- |
| 05 | 0.253 CTTCCCTG            |    |    |   |                |
| 1  | mm10_knownGene_uc007lgn.1 | 5  | 11 | - | 10.8143 9.74e- |
| 05 | 0.253 CTTCCCTG            |    |    |   |                |
| 1  | mm10_knownGene_uc009mih.2 | 5  | 11 | - | 10.8143 9.74e- |
| 05 | 0.253 CTCCCTG             |    |    |   |                |
| 1  | mm10_knownGene_uc009erk.1 | 11 | 17 | + | 10.8143 9.74e- |
| 05 | 0.253 CTCCCTG             |    |    |   |                |
| 1  | mm10_knownGene_uc009rhc.2 | 5  | 11 | - | 10.8143 9.74e- |
| 05 | 0.253 CTTCCCTG            |    |    |   |                |
| 1  | mm10_knownGene_uc009oww.1 | 5  | 11 | - | 10.8143 9.74e- |
| 05 | 0.253 CTCCCTG             |    |    |   |                |

|    |                           |    |    |   |                |
|----|---------------------------|----|----|---|----------------|
| 1  | mm10_knownGene_uc007dup.1 | 11 | 17 | + | 10.8143 9.74e- |
| 05 | 0.253 CTTCCCTG            |    |    |   |                |
| 1  | mm10_knownGene_uc007oqx.1 | 11 | 17 | + | 10.8143 9.74e- |
| 05 | 0.253 CTTCCCTG            |    |    |   |                |
| 1  | mm10_knownGene_uc008fsz.2 | 5  | 11 | - | 10.8143 9.74e- |
| 05 | 0.253 CTTCCCTG            |    |    |   |                |
| 1  | mm10_knownGene_uc009mig.1 | 5  | 11 | - | 10.8143 9.74e- |
| 05 | 0.253 CTCCCTG             |    |    |   |                |
| 1  | mm10_knownGene_uc007xbh.2 | 5  | 11 | - | 10.8143 9.74e- |
| 05 | 0.253 CTTCCCTG            |    |    |   |                |
| 1  | mm10_knownGene_uc007zbj.1 | 5  | 11 | - | 10.8143 9.74e- |
| 05 | 0.253 CTCCCTG             |    |    |   |                |
| 1  | mm10_knownGene_uc033gia.1 | 11 | 17 | + | 10.8143 9.74e- |
| 05 | 0.253 CTTCCCTG            |    |    |   |                |
| 1  | mm10_knownGene_uc009dsu.3 | 11 | 17 | + | 10.8143 9.74e- |
| 05 | 0.253 CTTCCCTG            |    |    |   |                |
| 1  | mm10_knownGene_uc012bfi.1 | 5  | 11 | - | 10.8143 9.74e- |
| 05 | 0.253 CTTCCCTG            |    |    |   |                |
| 1  | mm10_knownGene_uc007tnu.1 | 5  | 11 | - | 10.8143 9.74e- |
| 05 | 0.253 CTTCCCTG            |    |    |   |                |
| 1  | mm10_knownGene_uc033iss.1 | 11 | 17 | + | 10.8143 9.74e- |
| 05 | 0.253 CTTCCCTG            |    |    |   |                |
| 1  | mm10_knownGene_uc009jbs.1 | 5  | 11 | - | 10.8143 9.74e- |
| 05 | 0.253 CTCCCTG             |    |    |   |                |
| 1  | mm10_knownGene_uc007pqq.2 | 5  | 11 | - | 10.8143 9.74e- |
| 05 | 0.253 CTTCCCTG            |    |    |   |                |
| 1  | mm10_knownGene_uc009htb.2 | 5  | 11 | - | 10.8143 9.74e- |
| 05 | 0.253 CTCCCTG             |    |    |   |                |
| 1  | mm10_knownGene_uc007ffe.1 | 11 | 17 | + | 10.8143 9.74e- |
| 05 | 0.253 CTTCCCTG            |    |    |   |                |
| 1  | mm10_knownGene_uc012fli.2 | 11 | 17 | + | 10.8143 9.74e- |
| 05 | 0.253 CTTCCCTG            |    |    |   |                |
| 1  | mm10_knownGene_uc007pqh.2 | 5  | 11 | - | 10.8143 9.74e- |
| 05 | 0.253 CTTCCCTG            |    |    |   |                |
| 1  | mm10_knownGene_uc012gzj.1 | 5  | 11 | - | 10.8143 9.74e- |
| 05 | 0.253 CTTCCCTG            |    |    |   |                |
| 1  | mm10_knownGene_uc009cqy.2 | 11 | 17 | + | 10.8143 9.74e- |
| 05 | 0.253 CTTCCCTG            |    |    |   |                |
| 1  | mm10_knownGene_uc009hdc.3 | 11 | 17 | + | 10.8143 9.74e- |
| 05 | 0.253 CTTCCCTG            |    |    |   |                |
| 1  | mm10_knownGene_uc007lzd.1 | 12 | 18 | + | 10.8143 9.74e- |
| 05 | 0.253 CTTCCCTG            |    |    |   |                |
| 1  | mm10_knownGene_uc009mqb.1 | 6  | 12 | - | 10.8143 9.74e- |
| 05 | 0.253 CTTCCCTG            |    |    |   |                |
| 1  | mm10_knownGene_uc008rem.1 | 12 | 18 | + | 10.8143 9.74e- |
| 05 | 0.253 CTTCCCTG            |    |    |   |                |
| 1  | mm10_knownGene_uc009fjm.1 | 6  | 12 | - | 10.8143 9.74e- |
| 05 | 0.253 CTCCCTG             |    |    |   |                |
| 1  | mm10_knownGene_uc007ecg.1 | 6  | 12 | - | 10.8143 9.74e- |
| 05 | 0.253 CTTCCCTG            |    |    |   |                |
| 1  | mm10_knownGene_uc007hyw.2 | 6  | 12 | - | 10.8143 9.74e- |
| 05 | 0.253 CTTCCCTG            |    |    |   |                |
| 1  | mm10_knownGene_uc009kbz.1 | 12 | 18 | + | 10.8143 9.74e- |
| 05 | 0.253 CTTCCCTG            |    |    |   |                |
| 1  | mm10_knownGene_uc008qze.2 | 12 | 18 | + | 10.8143 9.74e- |
| 05 | 0.253 CTCCCTG             |    |    |   |                |
| 1  | mm10_knownGene_uc012cgb.1 | 6  | 12 | - | 10.8143 9.74e- |
| 05 | 0.253 CTTCCCTG            |    |    |   |                |
| 1  | mm10_knownGene_uc008xvh.2 | 6  | 12 | - | 10.8143 9.74e- |
| 05 | 0.253 CTTCCCTG            |    |    |   |                |
| 1  | mm10_knownGene_uc008yhf.1 | 12 | 18 | + | 10.8143 9.74e- |
| 05 | 0.253 CTCCCTG             |    |    |   |                |

|    |                           |    |    |   |                |
|----|---------------------------|----|----|---|----------------|
| 1  | mm10_knownGene_uc008zgn.1 | 6  | 12 | - | 10.8143 9.74e- |
| 05 | 0.253 CTTCCCTG            |    |    |   |                |
| 1  | mm10_knownGene_uc009aco.1 | 12 | 18 | + | 10.8143 9.74e- |
| 05 | 0.253 CTTCCCTG            |    |    |   |                |
| 1  | mm10_knownGene_uc009bsa.1 | 12 | 18 | + | 10.8143 9.74e- |
| 05 | 0.253 CTTCCCTG            |    |    |   |                |
| 1  | mm10_knownGene_uc008zjx.1 | 12 | 18 | + | 10.8143 9.74e- |
| 05 | 0.253 CTCCCTG             |    |    |   |                |
| 1  | mm10_knownGene_uc009iup.1 | 6  | 12 | - | 10.8143 9.74e- |
| 05 | 0.253 CTTCCCTG            |    |    |   |                |
| 1  | mm10_knownGene_uc011zsr.2 | 6  | 12 | - | 10.8143 9.74e- |
| 05 | 0.253 CTCCCTG             |    |    |   |                |
| 1  | mm10_knownGene_uc009anc.2 | 12 | 18 | + | 10.8143 9.74e- |
| 05 | 0.253 CTCCCTG             |    |    |   |                |
| 1  | mm10_knownGene_uc008hvy.1 | 6  | 12 | - | 10.8143 9.74e- |
| 05 | 0.253 CTCCCTG             |    |    |   |                |
| 1  | mm10_knownGene_uc008zjv.2 | 12 | 18 | + | 10.8143 9.74e- |
| 05 | 0.253 CTCCCTG             |    |    |   |                |
| 1  | mm10_knownGene_uc011ytm.1 | 6  | 12 | - | 10.8143 9.74e- |
| 05 | 0.253 CTTCCCTG            |    |    |   |                |
| 1  | mm10_knownGene_uc007rjf.2 | 12 | 18 | + | 10.8143 9.74e- |
| 05 | 0.253 CTCCCTG             |    |    |   |                |
| 1  | mm10_knownGene_uc009qtn.2 | 12 | 18 | + | 10.8143 9.74e- |
| 05 | 0.253 CTTCCCTG            |    |    |   |                |
| 1  | mm10_knownGene_uc009m11.3 | 6  | 12 | - | 10.8143 9.74e- |
| 05 | 0.253 CTCCCTG             |    |    |   |                |
| 1  | mm10_knownGene_uc009pqu.2 | 12 | 18 | + | 10.8143 9.74e- |
| 05 | 0.253 CTTCCCTG            |    |    |   |                |
| 1  | mm10_knownGene_uc012bma.1 | 12 | 18 | + | 10.8143 9.74e- |
| 05 | 0.253 CTTCCCTG            |    |    |   |                |
| 1  | mm10_knownGene_uc008jsq.1 | 6  | 12 | - | 10.8143 9.74e- |
| 05 | 0.253 CTTCCCTG            |    |    |   |                |
| 1  | mm10_knownGene_uc008hoh.2 | 12 | 18 | + | 10.8143 9.74e- |
| 05 | 0.253 CTTCCCTG            |    |    |   |                |
| 1  | mm10_knownGene_uc012hjf.1 | 12 | 18 | + | 10.8143 9.74e- |
| 05 | 0.253 CTCCCTG             |    |    |   |                |
| 1  | mm10_knownGene_uc008ivm.1 | 12 | 18 | + | 10.8143 9.74e- |
| 05 | 0.253 CTTCCCTG            |    |    |   |                |
| 1  | mm10_knownGene_uc012cmh.1 | 6  | 12 | - | 10.8143 9.74e- |
| 05 | 0.253 CTCCCTG             |    |    |   |                |
| 1  | mm10_knownGene_uc009rxo.2 | 7  | 13 | - | 10.8143 9.74e- |
| 05 | 0.253 CTTCCCTG            |    |    |   |                |
| 1  | mm10_knownGene_uc033ilo.1 | 7  | 13 | - | 10.8143 9.74e- |
| 05 | 0.253 CTCCCTG             |    |    |   |                |
| 1  | mm10_knownGene_uc007frh.2 | 13 | 19 | + | 10.8143 9.74e- |
| 05 | 0.253 CTTCCCTG            |    |    |   |                |
| 1  | mm10_knownGene_uc012bdk.1 | 13 | 19 | + | 10.8143 9.74e- |
| 05 | 0.253 CTTCCCTG            |    |    |   |                |
| 1  | mm10_knownGene_uc009cru.2 | 7  | 13 | - | 10.8143 9.74e- |
| 05 | 0.253 CTCCCTG             |    |    |   |                |
| 1  | mm10_knownGene_uc033iys.1 | 7  | 13 | - | 10.8143 9.74e- |
| 05 | 0.253 CTTCCCTG            |    |    |   |                |
| 1  | mm10_knownGene_uc029tdb.1 | 7  | 13 | - | 10.8143 9.74e- |
| 05 | 0.253 CTTCCCTG            |    |    |   |                |
| 1  | mm10_knownGene_uc007jet.2 | 13 | 19 | + | 10.8143 9.74e- |
| 05 | 0.253 CTTCCCTG            |    |    |   |                |
| 1  | mm10_knownGene_uc007dql.2 | 7  | 13 | - | 10.8143 9.74e- |
| 05 | 0.253 CTTCCCTG            |    |    |   |                |
| 1  | mm10_knownGene_uc011wjc.1 | 13 | 19 | + | 10.8143 9.74e- |
| 05 | 0.253 CTCCCTG             |    |    |   |                |
| 1  | mm10_knownGene_uc033gqs.1 | 7  | 13 | - | 10.8143 9.74e- |
| 05 | 0.253 CTCCCTG             |    |    |   |                |

|    |                           |    |    |   |                |
|----|---------------------------|----|----|---|----------------|
| 1  | mm10_knownGene_uc033foa.1 | 13 | 19 | + | 10.8143 9.74e- |
| 05 | 0.253 CTTCCTG             |    |    |   |                |
| 1  | mm10_knownGene_uc011zvl.1 | 7  | 13 | - | 10.8143 9.74e- |
| 05 | 0.253 CTCCCTG             |    |    |   |                |
| 1  | mm10_knownGene_uc007fnx.2 | 7  | 13 | - | 10.8143 9.74e- |
| 05 | 0.253 CTTCCTG             |    |    |   |                |
| 1  | mm10_knownGene_uc029qnh.1 | 7  | 13 | - | 10.8143 9.74e- |
| 05 | 0.253 CTCCCTG             |    |    |   |                |
| 1  | mm10_knownGene_uc007ejj.2 | 7  | 13 | - | 10.8143 9.74e- |
| 05 | 0.253 CTTCCTG             |    |    |   |                |
| 1  | mm10_knownGene_uc007hzj.1 | 7  | 13 | - | 10.8143 9.74e- |
| 05 | 0.253 CTCCCTG             |    |    |   |                |
| 1  | mm10_knownGene_uc007cai.1 | 13 | 19 | + | 10.8143 9.74e- |
| 05 | 0.253 CTTCCTG             |    |    |   |                |
| 1  | mm10_knownGene_uc008sun.2 | 7  | 13 | - | 10.8143 9.74e- |
| 05 | 0.253 CTTCCTG             |    |    |   |                |
| 1  | mm10_knownGene_uc033jux.1 | 7  | 13 | - | 10.8143 9.74e- |
| 05 | 0.253 CTTCCTG             |    |    |   |                |
| 1  | mm10_knownGene_uc012axf.1 | 13 | 19 | + | 10.8143 9.74e- |
| 05 | 0.253 CTTCCTG             |    |    |   |                |
| 1  | mm10_knownGene_uc012gkf.1 | 7  | 13 | - | 10.8143 9.74e- |
| 05 | 0.253 CTTCCTG             |    |    |   |                |
| 1  | mm10_knownGene_uc007fny.2 | 7  | 13 | - | 10.8143 9.74e- |
| 05 | 0.253 CTTCCTG             |    |    |   |                |
| 1  | mm10_knownGene_uc033ful.1 | 13 | 19 | + | 10.8143 9.74e- |
| 05 | 0.253 CTCCCTG             |    |    |   |                |
| 1  | mm10_knownGene_uc033fvi.1 | 13 | 19 | + | 10.8143 9.74e- |
| 05 | 0.253 CTCCCTG             |    |    |   |                |
| 1  | mm10_knownGene_uc007khv.1 | 7  | 13 | - | 10.8143 9.74e- |
| 05 | 0.253 CTTCCTG             |    |    |   |                |
| 1  | mm10_knownGene_uc009pph.2 | 7  | 13 | - | 10.8143 9.74e- |
| 05 | 0.253 CTTCCTG             |    |    |   |                |
| 1  | mm10_knownGene_uc008aad.2 | 13 | 19 | + | 10.8143 9.74e- |
| 05 | 0.253 CTCCCTG             |    |    |   |                |
| 1  | mm10_knownGene_uc007fnw.2 | 7  | 13 | - | 10.8143 9.74e- |
| 05 | 0.253 CTTCCTG             |    |    |   |                |
| 1  | mm10_knownGene_uc008uxy.2 | 13 | 19 | + | 10.8143 9.74e- |
| 05 | 0.253 CTCCCTG             |    |    |   |                |
| 1  | mm10_knownGene_uc008vdp.1 | 7  | 13 | - | 10.8143 9.74e- |
| 05 | 0.253 CTTCCTG             |    |    |   |                |
| 1  | mm10_knownGene_uc008suo.2 | 7  | 13 | - | 10.8143 9.74e- |
| 05 | 0.253 CTTCCTG             |    |    |   |                |
| 1  | mm10_knownGene_uc007eji.2 | 7  | 13 | - | 10.8143 9.74e- |
| 05 | 0.253 CTTCCTG             |    |    |   |                |
| 1  | mm10_knownGene_uc009aae.2 | 14 | 20 | + | 10.8143 9.74e- |
| 05 | 0.253 CTTCCTG             |    |    |   |                |
| 1  | mm10_knownGene_uc008jni.2 | 8  | 14 | - | 10.8143 9.74e- |
| 05 | 0.253 CTCCCTG             |    |    |   |                |
| 1  | mm10_knownGene_uc007arb.2 | 8  | 14 | - | 10.8143 9.74e- |
| 05 | 0.253 CTCCCTG             |    |    |   |                |
| 1  | mm10_knownGene_uc008jvm.2 | 8  | 14 | - | 10.8143 9.74e- |
| 05 | 0.253 CTTCCTG             |    |    |   |                |
| 1  | mm10_knownGene_uc012eoj.2 | 8  | 14 | - | 10.8143 9.74e- |
| 05 | 0.253 CTCCCTG             |    |    |   |                |
| 1  | mm10_knownGene_uc009jxl.1 | 14 | 20 | + | 10.8143 9.74e- |
| 05 | 0.253 CTCCCTG             |    |    |   |                |
| 1  | mm10_knownGene_uc012gon.3 | 14 | 20 | + | 10.8143 9.74e- |
| 05 | 0.253 CTTCCTG             |    |    |   |                |
| 1  | mm10_knownGene_uc033hpt.1 | 14 | 20 | + | 10.8143 9.74e- |
| 05 | 0.253 CTCCCTG             |    |    |   |                |
| 1  | mm10_knownGene_uc033fpc.1 | 14 | 20 | + | 10.8143 9.74e- |
| 05 | 0.253 CTTCCTG             |    |    |   |                |

|    |                           |    |    |   |                |
|----|---------------------------|----|----|---|----------------|
| 1  | mm10_knownGene_uc008gar.1 | 8  | 14 | - | 10.8143 9.74e- |
| 05 | 0.253 CTTCCTG             |    |    |   |                |
| 1  | mm10_knownGene_uc009svg.1 | 8  | 14 | - | 10.8143 9.74e- |
| 05 | 0.253 CTCCCTG             |    |    |   |                |
| 1  | mm10_knownGene_uc008nju.2 | 8  | 14 | - | 10.8143 9.74e- |
| 05 | 0.253 CTCCCTG             |    |    |   |                |
| 1  | mm10_knownGene_uc008njr.2 | 8  | 14 | - | 10.8143 9.74e- |
| 05 | 0.253 CTCCCTG             |    |    |   |                |
| 1  | mm10_knownGene_uc009gmn.1 | 14 | 20 | + | 10.8143 9.74e- |
| 05 | 0.253 CTTCCTG             |    |    |   |                |
| 1  | mm10_knownGene_uc008njs.2 | 8  | 14 | - | 10.8143 9.74e- |
| 05 | 0.253 CTCCCTG             |    |    |   |                |
| 1  | mm10_knownGene_uc009jxk.1 | 14 | 20 | + | 10.8143 9.74e- |
| 05 | 0.253 CTCCCTG             |    |    |   |                |
| 1  | mm10_knownGene_uc008usu.1 | 14 | 20 | + | 10.8143 9.74e- |
| 05 | 0.253 CTCCCTG             |    |    |   |                |
| 1  | mm10_knownGene_uc009flz.1 | 8  | 14 | - | 10.8143 9.74e- |
| 05 | 0.253 CTTCCTG             |    |    |   |                |
| 1  | mm10_knownGene_uc008njv.2 | 8  | 14 | - | 10.8143 9.74e- |
| 05 | 0.253 CTCCCTG             |    |    |   |                |
| 1  | mm10_knownGene_uc008djc.1 | 14 | 20 | + | 10.8143 9.74e- |
| 05 | 0.253 CTTCCTG             |    |    |   |                |
| 1  | mm10_knownGene_uc008cci.1 | 14 | 20 | + | 10.8143 9.74e- |
| 05 | 0.253 CTCCCTG             |    |    |   |                |
| 1  | mm10_knownGene_uc008jng.2 | 8  | 14 | - | 10.8143 9.74e- |
| 05 | 0.253 CTCCCTG             |    |    |   |                |
| 1  | mm10_knownGene_uc007dvi.1 | 8  | 14 | - | 10.8143 9.74e- |
| 05 | 0.253 CTCCCTG             |    |    |   |                |
| 1  | mm10_knownGene_uc009aad.2 | 14 | 20 | + | 10.8143 9.74e- |
| 05 | 0.253 CTTCCTG             |    |    |   |                |
| 1  | mm10_knownGene_uc008obp.2 | 14 | 20 | + | 10.8143 9.74e- |
| 05 | 0.253 CTCCCTG             |    |    |   |                |
| 1  | mm10_knownGene_uc008gas.2 | 8  | 14 | - | 10.8143 9.74e- |
| 05 | 0.253 CTTCCTG             |    |    |   |                |
| 1  | mm10_knownGene_uc008obo.2 | 14 | 20 | + | 10.8143 9.74e- |
| 05 | 0.253 CTCCCTG             |    |    |   |                |
| 1  | mm10_knownGene_uc012bvy.1 | 8  | 14 | - | 10.8143 9.74e- |
| 05 | 0.253 CTTCCTG             |    |    |   |                |
| 1  | mm10_knownGene_uc008uhe.1 | 8  | 14 | - | 10.8143 9.74e- |
| 05 | 0.253 CTTCCTG             |    |    |   |                |
| 1  | mm10_knownGene_uc008gaq.1 | 8  | 14 | - | 10.8143 9.74e- |
| 05 | 0.253 CTTCCTG             |    |    |   |                |
| 1  | mm10_knownGene_uc012eao.1 | 14 | 20 | + | 10.8143 9.74e- |
| 05 | 0.253 CTTCCTG             |    |    |   |                |
| 1  | mm10_knownGene_uc012bgk.1 | 8  | 14 | - | 10.8143 9.74e- |
| 05 | 0.253 CTTCCTG             |    |    |   |                |
| 1  | mm10_knownGene_uc007muk.1 | 14 | 20 | + | 10.8143 9.74e- |
| 05 | 0.253 CTTCCTG             |    |    |   |                |
| 1  | mm10_knownGene_uc008yxl.1 | 14 | 20 | + | 10.8143 9.74e- |
| 05 | 0.253 CTCCCTG             |    |    |   |                |
| 1  | mm10_knownGene_uc009ofi.1 | 14 | 20 | + | 10.8143 9.74e- |
| 05 | 0.253 CTTCCTG             |    |    |   |                |
| 1  | mm10_knownGene_uc008jvo.2 | 8  | 14 | - | 10.8143 9.74e- |
| 05 | 0.253 CTTCCTG             |    |    |   |                |
| 1  | mm10_knownGene_uc009iju.1 | 8  | 14 | - | 10.8143 9.74e- |
| 05 | 0.253 CTTCCTG             |    |    |   |                |
| 1  | mm10_knownGene_uc009qic.1 | 14 | 20 | + | 10.8143 9.74e- |
| 05 | 0.253 CTCCCTG             |    |    |   |                |
| 1  | mm10_knownGene_uc008njt.2 | 8  | 14 | - | 10.8143 9.74e- |
| 05 | 0.253 CTCCCTG             |    |    |   |                |
| 1  | mm10_knownGene_uc057ccp.1 | 14 | 20 | + | 10.8143 9.74e- |
| 05 | 0.253 CTTCCTG             |    |    |   |                |

|    |                           |    |    |   |                |
|----|---------------------------|----|----|---|----------------|
| 1  | mm10_knownGene_uc008dul.1 | 8  | 14 | - | 10.8143 9.74e- |
| 05 | 0.253 CTTCCTG             |    |    |   |                |
| 1  | mm10_knownGene_uc056yob.1 | 14 | 20 | + | 10.8143 9.74e- |
| 05 | 0.253 CTTCCTG             |    |    |   |                |
| 1  | mm10_knownGene_uc008jnh.2 | 8  | 14 | - | 10.8143 9.74e- |
| 05 | 0.253 CTCCCTG             |    |    |   |                |
| 1  | mm10_knownGene_uc008mxt.1 | 14 | 20 | + | 10.8143 9.74e- |
| 05 | 0.253 CTTCCTG             |    |    |   |                |
| 1  | mm10_knownGene_uc008jvn.2 | 8  | 14 | - | 10.8143 9.74e- |
| 05 | 0.253 CTTCCTG             |    |    |   |                |
| 1  | mm10_knownGene_uc033izh.1 | 8  | 14 | - | 10.8143 9.74e- |
| 05 | 0.253 CTCCCTG             |    |    |   |                |
| 1  | mm10_knownGene_uc008dzn.1 | 14 | 20 | + | 10.8143 9.74e- |
| 05 | 0.253 CTTCCTG             |    |    |   |                |
| 1  | mm10_knownGene_uc012cgy.1 | 8  | 14 | - | 10.8143 9.74e- |
| 05 | 0.253 CTCCCTG             |    |    |   |                |
| 1  | mm10_knownGene_uc029uwx.1 | 14 | 20 | + | 10.8143 9.74e- |
| 05 | 0.253 CTCCCTG             |    |    |   |                |
| 1  | mm10_knownGene_uc009kih.1 | 8  | 14 | - | 10.8143 9.74e- |
| 05 | 0.253 CTCCCTG             |    |    |   |                |
| 1  | mm10_knownGene_uc008vkw.1 | 15 | 21 | + | 10.8143 9.74e- |
| 05 | 0.253 CTCCCTG             |    |    |   |                |
| 1  | mm10_knownGene_uc029ugt.1 | 15 | 21 | + | 10.8143 9.74e- |
| 05 | 0.253 CTTCCTG             |    |    |   |                |
| 1  | mm10_knownGene_uc008yjj.1 | 15 | 21 | + | 10.8143 9.74e- |
| 05 | 0.253 CTTCCTG             |    |    |   |                |
| 1  | mm10_knownGene_uc029rzw.1 | 9  | 15 | - | 10.8143 9.74e- |
| 05 | 0.253 CTCCCTG             |    |    |   |                |
| 1  | mm10_knownGene_uc008nbz.1 | 15 | 21 | + | 10.8143 9.74e- |
| 05 | 0.253 CTTCCTG             |    |    |   |                |
| 1  | mm10_knownGene_uc008bxy.1 | 9  | 15 | - | 10.8143 9.74e- |
| 05 | 0.253 CTTCCTG             |    |    |   |                |
| 1  | mm10_knownGene_uc009tqk.2 | 9  | 15 | - | 10.8143 9.74e- |
| 05 | 0.253 CTTCCTG             |    |    |   |                |
| 1  | mm10_knownGene_uc009edh.1 | 9  | 15 | - | 10.8143 9.74e- |
| 05 | 0.253 CTCCCTG             |    |    |   |                |
| 1  | mm10_knownGene_uc008asa.1 | 15 | 21 | + | 10.8143 9.74e- |
| 05 | 0.253 CTTCCTG             |    |    |   |                |
| 1  | mm10_knownGene_uc033hvd.1 | 15 | 21 | + | 10.8143 9.74e- |
| 05 | 0.253 CTTCCTG             |    |    |   |                |
| 1  | mm10_knownGene_uc008nfj.2 | 9  | 15 | - | 10.8143 9.74e- |
| 05 | 0.253 CTCCCTG             |    |    |   |                |
| 1  | mm10_knownGene_uc012ccx.1 | 9  | 15 | - | 10.8143 9.74e- |
| 05 | 0.253 CTTCCTG             |    |    |   |                |
| 1  | mm10_knownGene_uc007xyy.1 | 15 | 21 | + | 10.8143 9.74e- |
| 05 | 0.253 CTCCCTG             |    |    |   |                |
| 1  | mm10_knownGene_uc008yjz.1 | 15 | 21 | + | 10.8143 9.74e- |
| 05 | 0.253 CTTCCTG             |    |    |   |                |
| 1  | mm10_knownGene_uc009kpd.2 | 15 | 21 | + | 10.8143 9.74e- |
| 05 | 0.253 CTCCCTG             |    |    |   |                |
| 1  | mm10_knownGene_uc056ykq.1 | 15 | 21 | + | 10.8143 9.74e- |
| 05 | 0.253 CTCCCTG             |    |    |   |                |
| 1  | mm10_knownGene_uc009aaf.1 | 15 | 21 | + | 10.8143 9.74e- |
| 05 | 0.253 CTCCCTG             |    |    |   |                |
| 1  | mm10_knownGene_uc057bvd.1 | 9  | 15 | - | 10.8143 9.74e- |
| 05 | 0.253 CTTCCTG             |    |    |   |                |
| 1  | mm10_knownGene_uc009lkw.1 | 9  | 15 | - | 10.8143 9.74e- |
| 05 | 0.253 CTTCCTG             |    |    |   |                |
| 1  | mm10_knownGene_uc009qdu.2 | 15 | 21 | + | 10.8143 9.74e- |
| 05 | 0.253 CTTCCTG             |    |    |   |                |
| 1  | mm10_knownGene_uc029vpb.1 | 15 | 21 | + | 10.8143 9.74e- |
| 05 | 0.253 CTTCCTG             |    |    |   |                |



|    |                           |    |    |   |                |
|----|---------------------------|----|----|---|----------------|
| 1  | mm10_knownGene_uc007dys.1 | 9  | 15 | - | 10.8143 9.74e- |
| 05 | 0.253 CTTCCTG             |    |    |   |                |
| 1  | mm10_knownGene_uc007uqv.1 | 9  | 15 | - | 10.8143 9.74e- |
| 05 | 0.253 CTCCCTG             |    |    |   |                |
| 1  | mm10_knownGene_uc012faq.1 | 9  | 15 | - | 10.8143 9.74e- |
| 05 | 0.253 CTTCCTG             |    |    |   |                |
| 1  | mm10_knownGene_uc007ilm.1 | 9  | 15 | - | 10.8143 9.74e- |
| 05 | 0.253 CTCCCTG             |    |    |   |                |
| 1  | mm10_knownGene_uc008mak.1 | 9  | 15 | - | 10.8143 9.74e- |
| 05 | 0.253 CTTCCTG             |    |    |   |                |
| 1  | mm10_knownGene_uc033ivq.1 | 15 | 21 | + | 10.8143 9.74e- |
| 05 | 0.253 CTTCCTG             |    |    |   |                |
| 1  | mm10_knownGene_uc009lwg.1 | 15 | 21 | + | 10.8143 9.74e- |
| 05 | 0.253 CTCCCTG             |    |    |   |                |
| 1  | mm10_knownGene_uc009edi.1 | 9  | 15 | - | 10.8143 9.74e- |
| 05 | 0.253 CTCCCTG             |    |    |   |                |
| 1  | mm10_knownGene_uc009kpe.2 | 15 | 21 | + | 10.8143 9.74e- |
| 05 | 0.253 CTCCCTG             |    |    |   |                |
| 1  | mm10_knownGene_uc029vmx.1 | 9  | 15 | - | 10.8143 9.74e- |
| 05 | 0.253 CTCCCTG             |    |    |   |                |
| 1  | mm10_knownGene_uc011xwu.1 | 9  | 15 | - | 10.8143 9.74e- |
| 05 | 0.253 CTCCCTG             |    |    |   |                |
| 1  | mm10_knownGene_uc057aox.1 | 15 | 21 | + | 10.8143 9.74e- |
| 05 | 0.253 CTTCCTG             |    |    |   |                |
| 1  | mm10_knownGene_uc009kpf.2 | 15 | 21 | + | 10.8143 9.74e- |
| 05 | 0.253 CTCCCTG             |    |    |   |                |
| 1  | mm10_knownGene_uc008koy.1 | 9  | 15 | - | 10.8143 9.74e- |
| 05 | 0.253 CTCCCTG             |    |    |   |                |
| 1  | mm10_knownGene_uc012hnz.1 | 15 | 21 | + | 10.8143 9.74e- |
| 05 | 0.253 CTCCCTG             |    |    |   |                |
| 1  | mm10_knownGene_uc029vuk.1 | 15 | 21 | + | 10.8143 9.74e- |
| 05 | 0.253 CTTCCTG             |    |    |   |                |
| 1  | mm10_knownGene_uc009eoj.2 | 10 | 16 | - | 10.8143 9.74e- |
| 05 | 0.253 CTTCCTG             |    |    |   |                |
| 1  | mm10_knownGene_uc012cjh.1 | 10 | 16 | - | 10.8143 9.74e- |
| 05 | 0.253 CTTCCTG             |    |    |   |                |
| 1  | mm10_knownGene_uc029wcf.1 | 10 | 16 | - | 10.8143 9.74e- |
| 05 | 0.253 CTCCCTG             |    |    |   |                |
| 1  | mm10_knownGene_uc029qsk.1 | 10 | 16 | - | 10.8143 9.74e- |
| 05 | 0.253 CTTCCTG             |    |    |   |                |
| 1  | mm10_knownGene_uc008ota.1 | 16 | 22 | + | 10.8143 9.74e- |
| 05 | 0.253 CTTCCTG             |    |    |   |                |
| 1  | mm10_knownGene_uc007unl.1 | 10 | 16 | - | 10.8143 9.74e- |
| 05 | 0.253 CTTCCTG             |    |    |   |                |
| 1  | mm10_knownGene_uc008kgm.1 | 16 | 22 | + | 10.8143 9.74e- |
| 05 | 0.253 CTTCCTG             |    |    |   |                |
| 1  | mm10_knownGene_uc008ooh.2 | 10 | 16 | - | 10.8143 9.74e- |
| 05 | 0.253 CTCCCTG             |    |    |   |                |
| 1  | mm10_knownGene_uc007qbl.1 | 16 | 22 | + | 10.8143 9.74e- |
| 05 | 0.253 CTTCCTG             |    |    |   |                |
| 1  | mm10_knownGene_uc007orm.1 | 16 | 22 | + | 10.8143 9.74e- |
| 05 | 0.253 CTTCCTG             |    |    |   |                |
| 1  | mm10_knownGene_uc008kgn.1 | 16 | 22 | + | 10.8143 9.74e- |
| 05 | 0.253 CTTCCTG             |    |    |   |                |
| 1  | mm10_knownGene_uc009psn.1 | 10 | 16 | - | 10.8143 9.74e- |
| 05 | 0.253 CTCCCTG             |    |    |   |                |
| 1  | mm10_knownGene_uc007bnc.1 | 10 | 16 | - | 10.8143 9.74e- |
| 05 | 0.253 CTCCCTG             |    |    |   |                |
| 1  | mm10_knownGene_uc012fic.2 | 10 | 16 | - | 10.8143 9.74e- |
| 05 | 0.253 CTTCCTG             |    |    |   |                |
| 1  | mm10_knownGene_uc009aif.1 | 16 | 22 | + | 10.8143 9.74e- |
| 05 | 0.253 CTCCCTG             |    |    |   |                |

|    |                           |    |    |   |                |
|----|---------------------------|----|----|---|----------------|
| 1  | mm10_knownGene_uc033gqr.1 | 16 | 22 | + | 10.8143 9.74e- |
| 05 | 0.253 CTCCCTG             |    |    |   |                |
| 1  | mm10_knownGene_uc007fnz.2 | 10 | 16 | - | 10.8143 9.74e- |
| 05 | 0.253 CTCCCTG             |    |    |   |                |
| 1  | mm10_knownGene_uc007cpw.2 | 10 | 16 | - | 10.8143 9.74e- |
| 05 | 0.253 CTCCCTG             |    |    |   |                |
| 1  | mm10_knownGene_uc007fob.2 | 10 | 16 | - | 10.8143 9.74e- |
| 05 | 0.253 CTCCCTG             |    |    |   |                |
| 1  | mm10_knownGene_uc008jkv.2 | 10 | 16 | - | 10.8143 9.74e- |
| 05 | 0.253 CTCCCTG             |    |    |   |                |
| 1  | mm10_knownGene_uc011yfg.1 | 10 | 16 | - | 10.8143 9.74e- |
| 05 | 0.253 CTCCCTG             |    |    |   |                |
| 1  | mm10_knownGene_uc033gtx.1 | 10 | 16 | - | 10.8143 9.74e- |
| 05 | 0.253 CTCCCTG             |    |    |   |                |
| 1  | mm10_knownGene_uc009eok.2 | 10 | 16 | - | 10.8143 9.74e- |
| 05 | 0.253 CTCCCTG             |    |    |   |                |
| 1  | mm10_knownGene_uc009cuo.2 | 10 | 16 | - | 10.8143 9.74e- |
| 05 | 0.253 CTCCCTG             |    |    |   |                |
| 1  | mm10_knownGene_uc008ykg.2 | 10 | 16 | - | 10.8143 9.74e- |
| 05 | 0.253 CTCCCTG             |    |    |   |                |
| 1  | mm10_knownGene_uc008fgp.2 | 10 | 16 | - | 10.8143 9.74e- |
| 05 | 0.253 CTCCCTG             |    |    |   |                |
| 1  | mm10_knownGene_uc008egs.2 | 10 | 16 | - | 10.8143 9.74e- |
| 05 | 0.253 CTCCCTG             |    |    |   |                |
| 1  | mm10_knownGene_uc007nrx.1 | 16 | 22 | + | 10.8143 9.74e- |
| 05 | 0.253 CTCCCTG             |    |    |   |                |
| 1  | mm10_knownGene_uc011wrq.1 | 16 | 22 | + | 10.8143 9.74e- |
| 05 | 0.253 CTCCCTG             |    |    |   |                |
| 1  | mm10_knownGene_uc007vmg.2 | 10 | 16 | - | 10.8143 9.74e- |
| 05 | 0.253 CTCCCTG             |    |    |   |                |
| 1  | mm10_knownGene_uc007avb.1 | 10 | 16 | - | 10.8143 9.74e- |
| 05 | 0.253 CTCCCTG             |    |    |   |                |
| 1  | mm10_knownGene_uc007lmn.1 | 10 | 16 | - | 10.8143 9.74e- |
| 05 | 0.253 CTCCCTG             |    |    |   |                |
| 1  | mm10_knownGene_uc007foa.2 | 10 | 16 | - | 10.8143 9.74e- |
| 05 | 0.253 CTCCCTG             |    |    |   |                |
| 1  | mm10_knownGene_uc029xkw.1 | 16 | 22 | + | 10.8143 9.74e- |
| 05 | 0.253 CTCCCTG             |    |    |   |                |
| 1  | mm10_knownGene_uc007fjy.2 | 10 | 16 | - | 10.8143 9.74e- |
| 05 | 0.253 CTCCCTG             |    |    |   |                |
| 1  | mm10_knownGene_uc029wre.1 | 10 | 16 | - | 10.8143 9.74e- |
| 05 | 0.253 CTCCCTG             |    |    |   |                |
| 1  | mm10_knownGene_uc008sil.2 | 10 | 16 | - | 10.8143 9.74e- |
| 05 | 0.253 CTCCCTG             |    |    |   |                |
| 1  | mm10_knownGene_uc009gwt.2 | 16 | 22 | + | 10.8143 9.74e- |
| 05 | 0.253 CTCCCTG             |    |    |   |                |
| 1  | mm10_knownGene_uc008jkw.1 | 10 | 16 | - | 10.8143 9.74e- |
| 05 | 0.253 CTCCCTG             |    |    |   |                |
| 1  | mm10_knownGene_uc009btu.1 | 11 | 17 | - | 10.8143 9.74e- |
| 05 | 0.253 CTCCCTG             |    |    |   |                |
| 1  | mm10_knownGene_uc007leb.1 | 17 | 23 | + | 10.8143 9.74e- |
| 05 | 0.253 CTCCCTG             |    |    |   |                |
| 1  | mm10_knownGene_uc009mqz.2 | 17 | 23 | + | 10.8143 9.74e- |
| 05 | 0.253 CTCCCTG             |    |    |   |                |
| 1  | mm10_knownGene_uc007pjz.2 | 11 | 17 | - | 10.8143 9.74e- |
| 05 | 0.253 CTCCCTG             |    |    |   |                |
| 1  | mm10_knownGene_uc009mrb.2 | 17 | 23 | + | 10.8143 9.74e- |
| 05 | 0.253 CTCCCTG             |    |    |   |                |
| 1  | mm10_knownGene_uc009lat.2 | 11 | 17 | - | 10.8143 9.74e- |
| 05 | 0.253 CTCCCTG             |    |    |   |                |
| 1  | mm10_knownGene_uc008nsc.2 | 17 | 23 | + | 10.8143 9.74e- |
| 05 | 0.253 CTCCCTG             |    |    |   |                |

|    |                           |    |    |   |                |
|----|---------------------------|----|----|---|----------------|
| 1  | mm10_knownGene_uc008pty.1 | 17 | 23 | + | 10.8143 9.74e- |
| 05 | 0.253 CTTCCCTG            |    |    |   |                |
| 1  | mm10_knownGene_uc012clz.1 | 11 | 17 | - | 10.8143 9.74e- |
| 05 | 0.253 CTTCCCTG            |    |    |   |                |
| 1  | mm10_knownGene_uc007pkd.2 | 11 | 17 | - | 10.8143 9.74e- |
| 05 | 0.253 CTTCCCTG            |    |    |   |                |
| 1  | mm10_knownGene_uc009gsj.2 | 11 | 17 | - | 10.8143 9.74e- |
| 05 | 0.253 CTCCCTG             |    |    |   |                |
| 1  | mm10_knownGene_uc007kxa.1 | 11 | 17 | - | 10.8143 9.74e- |
| 05 | 0.253 CTCCCTG             |    |    |   |                |
| 1  | mm10_knownGene_uc007qoz.2 | 17 | 23 | + | 10.8143 9.74e- |
| 05 | 0.253 CTTCCCTG            |    |    |   |                |
| 1  | mm10_knownGene_uc008bsm.1 | 11 | 17 | - | 10.8143 9.74e- |
| 05 | 0.253 CTTCCCTG            |    |    |   |                |
| 1  | mm10_knownGene_uc007pka.2 | 11 | 17 | - | 10.8143 9.74e- |
| 05 | 0.253 CTTCCCTG            |    |    |   |                |
| 1  | mm10_knownGene_uc007sqx.1 | 17 | 23 | + | 10.8143 9.74e- |
| 05 | 0.253 CTCCCTG             |    |    |   |                |
| 1  | mm10_knownGene_uc009mqx.2 | 17 | 23 | + | 10.8143 9.74e- |
| 05 | 0.253 CTCCCTG             |    |    |   |                |
| 1  | mm10_knownGene_uc009ddr.1 | 17 | 23 | + | 10.8143 9.74e- |
| 05 | 0.253 CTCCCTG             |    |    |   |                |
| 1  | mm10_knownGene_uc007omd.2 | 11 | 17 | - | 10.8143 9.74e- |
| 05 | 0.253 CTTCCCTG            |    |    |   |                |
| 1  | mm10_knownGene_uc009mra.2 | 17 | 23 | + | 10.8143 9.74e- |
| 05 | 0.253 CTCCCTG             |    |    |   |                |
| 1  | mm10_knownGene_uc009ddq.1 | 17 | 23 | + | 10.8143 9.74e- |
| 05 | 0.253 CTCCCTG             |    |    |   |                |
| 1  | mm10_knownGene_uc007gch.1 | 17 | 23 | + | 10.8143 9.74e- |
| 05 | 0.253 CTTCCCTG            |    |    |   |                |
| 1  | mm10_knownGene_uc007pkc.2 | 11 | 17 | - | 10.8143 9.74e- |
| 05 | 0.253 CTTCCCTG            |    |    |   |                |
| 1  | mm10_knownGene_uc009hcy.1 | 17 | 23 | + | 10.8143 9.74e- |
| 05 | 0.253 CTTCCCTG            |    |    |   |                |
| 1  | mm10_knownGene_uc008oiw.1 | 11 | 17 | - | 10.8143 9.74e- |
| 05 | 0.253 CTTCCCTG            |    |    |   |                |
| 1  | mm10_knownGene_uc009hcz.2 | 17 | 23 | + | 10.8143 9.74e- |
| 05 | 0.253 CTTCCCTG            |    |    |   |                |
| 1  | mm10_knownGene_uc007lia.1 | 11 | 17 | - | 10.8143 9.74e- |
| 05 | 0.253 CTTCCCTG            |    |    |   |                |
| 1  | mm10_knownGene_uc008oiv.1 | 11 | 17 | - | 10.8143 9.74e- |
| 05 | 0.253 CTTCCCTG            |    |    |   |                |
| 1  | mm10_knownGene_uc011xin.1 | 17 | 23 | + | 10.8143 9.74e- |
| 05 | 0.253 CTTCCCTG            |    |    |   |                |
| 1  | mm10_knownGene_uc009len.1 | 11 | 17 | - | 10.8143 9.74e- |
| 05 | 0.253 CTTCCCTG            |    |    |   |                |
| 1  | mm10_knownGene_uc008ptx.1 | 17 | 23 | + | 10.8143 9.74e- |
| 05 | 0.253 CTTCCCTG            |    |    |   |                |
| 1  | mm10_knownGene_uc007tuu.1 | 17 | 23 | + | 10.8143 9.74e- |
| 05 | 0.253 CTTCCCTG            |    |    |   |                |
| 1  | mm10_knownGene_uc029uop.1 | 11 | 17 | - | 10.8143 9.74e- |
| 05 | 0.253 CTTCCCTG            |    |    |   |                |
| 1  | mm10_knownGene_uc007rbt.2 | 11 | 17 | - | 10.8143 9.74e- |
| 05 | 0.253 CTTCCCTG            |    |    |   |                |
| 1  | mm10_knownGene_uc007kdy.1 | 18 | 24 | + | 10.8143 9.74e- |
| 05 | 0.253 CTCCCTG             |    |    |   |                |
| 1  | mm10_knownGene_uc033hdc.1 | 18 | 24 | + | 10.8143 9.74e- |
| 05 | 0.253 CTTCCCTG            |    |    |   |                |
| 1  | mm10_knownGene_uc008fit.2 | 18 | 24 | + | 10.8143 9.74e- |
| 05 | 0.253 CTTCCCTG            |    |    |   |                |
| 1  | mm10_knownGene_uc033hde.1 | 18 | 24 | + | 10.8143 9.74e- |
| 05 | 0.253 CTTCCCTG            |    |    |   |                |

|    |                           |    |    |   |                |
|----|---------------------------|----|----|---|----------------|
| 1  | mm10_knownGene_uc009ffk.1 | 18 | 24 | + | 10.8143 9.74e- |
| 05 | 0.253 CTCCCTG             |    |    |   |                |
| 1  | mm10_knownGene_uc007ufh.3 | 18 | 24 | + | 10.8143 9.74e- |
| 05 | 0.253 CTCCCTG             |    |    |   |                |
| 1  | mm10_knownGene_uc011zbp.1 | 18 | 24 | + | 10.8143 9.74e- |
| 05 | 0.253 CTCCCTG             |    |    |   |                |
| 1  | mm10_knownGene_uc029trd.1 | 12 | 18 | - | 10.8143 9.74e- |
| 05 | 0.253 CTCCCTG             |    |    |   |                |
| 1  | mm10_knownGene_uc009pgu.2 | 18 | 24 | + | 10.8143 9.74e- |
| 05 | 0.253 CTTCCCTG            |    |    |   |                |
| 1  | mm10_knownGene_uc033gtr.1 | 12 | 18 | - | 10.8143 9.74e- |
| 05 | 0.253 CTCCCTG             |    |    |   |                |
| 1  | mm10_knownGene_uc008edj.2 | 12 | 18 | - | 10.8143 9.74e- |
| 05 | 0.253 CTCCCTG             |    |    |   |                |
| 1  | mm10_knownGene_uc033hdd.1 | 18 | 24 | + | 10.8143 9.74e- |
| 05 | 0.253 CTTCCCTG            |    |    |   |                |
| 1  | mm10_knownGene_uc009thu.3 | 18 | 24 | + | 10.8143 9.74e- |
| 05 | 0.253 CTCCCTG             |    |    |   |                |
| 1  | mm10_knownGene_uc033gtu.1 | 12 | 18 | - | 10.8143 9.74e- |
| 05 | 0.253 CTCCCTG             |    |    |   |                |
| 1  | mm10_knownGene_uc012azs.1 | 12 | 18 | - | 10.8143 9.74e- |
| 05 | 0.253 CTCCCTG             |    |    |   |                |
| 1  | mm10_knownGene_uc007unt.1 | 18 | 24 | + | 10.8143 9.74e- |
| 05 | 0.253 CTTCCCTG            |    |    |   |                |
| 1  | mm10_knownGene_uc009eyy.2 | 12 | 18 | - | 10.8143 9.74e- |
| 05 | 0.253 CTTCCCTG            |    |    |   |                |
| 1  | mm10_knownGene_uc009pbw.2 | 18 | 24 | + | 10.8143 9.74e- |
| 05 | 0.253 CTTCCCTG            |    |    |   |                |
| 1  | mm10_knownGene_uc009fvx.1 | 18 | 24 | + | 10.8143 9.74e- |
| 05 | 0.253 CTCCCTG             |    |    |   |                |
| 1  | mm10_knownGene_uc011zbq.1 | 18 | 24 | + | 10.8143 9.74e- |
| 05 | 0.253 CTCCCTG             |    |    |   |                |
| 1  | mm10_knownGene_uc008mer.1 | 18 | 24 | + | 10.8143 9.74e- |
| 05 | 0.253 CTTCCCTG            |    |    |   |                |
| 1  | mm10_knownGene_uc007unu.1 | 18 | 24 | + | 10.8143 9.74e- |
| 05 | 0.253 CTTCCCTG            |    |    |   |                |
| 1  | mm10_knownGene_uc009rzd.1 | 18 | 24 | + | 10.8143 9.74e- |
| 05 | 0.253 CTCCCTG             |    |    |   |                |
| 1  | mm10_knownGene_uc008onr.2 | 18 | 24 | + | 10.8143 9.74e- |
| 05 | 0.253 CTTCCCTG            |    |    |   |                |
| 1  | mm10_knownGene_uc029vwv.1 | 12 | 18 | - | 10.8143 9.74e- |
| 05 | 0.253 CTCCCTG             |    |    |   |                |
| 1  | mm10_knownGene_uc009pgw.1 | 18 | 24 | + | 10.8143 9.74e- |
| 05 | 0.253 CTTCCCTG            |    |    |   |                |
| 1  | mm10_knownGene_uc009kku.1 | 18 | 24 | + | 10.8143 9.74e- |
| 05 | 0.253 CTCCCTG             |    |    |   |                |
| 1  | mm10_knownGene_uc009dvv.1 | 18 | 24 | + | 10.8143 9.74e- |
| 05 | 0.253 CTCCCTG             |    |    |   |                |
| 1  | mm10_knownGene_uc011xxy.1 | 18 | 24 | + | 10.8143 9.74e- |
| 05 | 0.253 CTTCCCTG            |    |    |   |                |
| 1  | mm10_knownGene_uc033gtt.1 | 12 | 18 | - | 10.8143 9.74e- |
| 05 | 0.253 CTCCCTG             |    |    |   |                |
| 1  | mm10_knownGene_uc008zen.1 | 18 | 24 | + | 10.8143 9.74e- |
| 05 | 0.253 CTTCCCTG            |    |    |   |                |
| 1  | mm10_knownGene_uc007unv.1 | 18 | 24 | + | 10.8143 9.74e- |
| 05 | 0.253 CTTCCCTG            |    |    |   |                |
| 1  | mm10_knownGene_uc008uun.2 | 18 | 24 | + | 10.8143 9.74e- |
| 05 | 0.253 CTTCCCTG            |    |    |   |                |
| 1  | mm10_knownGene_uc009pbx.2 | 18 | 24 | + | 10.8143 9.74e- |
| 05 | 0.253 CTTCCCTG            |    |    |   |                |
| 1  | mm10_knownGene_uc009fvw.1 | 18 | 24 | + | 10.8143 9.74e- |
| 05 | 0.253 CTCCCTG             |    |    |   |                |

|    |                            |    |    |   |                |
|----|----------------------------|----|----|---|----------------|
| 1  | mm10_knownGene_uc009fvy.1  | 18 | 24 | + | 10.8143 9.74e- |
| 05 | 0.253 CTCCCTG              |    |    |   |                |
| 1  | mm10_knownGene_uc007ufg.3  | 18 | 24 | + | 10.8143 9.74e- |
| 05 | 0.253 CTCCCTG              |    |    |   |                |
| 1  | mm10_knownGene_uc009pgv.1  | 18 | 24 | + | 10.8143 9.74e- |
| 05 | 0.253 CTTCCCTG             |    |    |   |                |
| 1  | mm10_knownGene_uc009pgt.2  | 18 | 24 | + | 10.8143 9.74e- |
| 05 | 0.253 CTTCCCTG             |    |    |   |                |
| 1  | mm10_knownGene_uc029via.1  | 18 | 24 | + | 10.8143 9.74e- |
| 05 | 0.253 CTTCCCTG             |    |    |   |                |
| 1  | mm10_knownGene_uc033gts.1  | 12 | 18 | - | 10.8143 9.74e- |
| 05 | 0.253 CTCCCTG              |    |    |   |                |
| 1  | mm10_knownGene_uc008yve.1  | 12 | 18 | - | 10.8143 9.74e- |
| 05 | 0.253 CTCCCTG              |    |    |   |                |
| 1  | mm10_knownGene_uc007lek.2  | 12 | 18 | - | 10.8143 9.74e- |
| 05 | 0.253 CTCCCTG              |    |    |   |                |
| 1  | mm10_knownGene_uc012azr.1  | 12 | 18 | - | 10.8143 9.74e- |
| 05 | 0.253 CTCCCTG              |    |    |   |                |
| 1  | mm10_knownGene_uc008zkl.1  | 18 | 24 | + | 10.8143 9.74e- |
| 05 | 0.253 CTCCCTG              |    |    |   |                |
| 1  | mm10_knownGene_uc033hej.1  | 18 | 24 | + | 10.8143 9.74e- |
| 05 | 0.253 CTCCCTG              |    |    |   |                |
| 1  | mm10_knownGene_uc007hyk.1  | 13 | 19 | - | 10.8143 9.74e- |
| 05 | 0.253 CTTCCCTG             |    |    |   |                |
| 1  | mm10_knownGene_uc012dib.1  | 19 | 25 | + | 10.8143 9.74e- |
| 05 | 0.253 CTCCCTG              |    |    |   |                |
| 1  | mm10_knownGene_uc009vdz.1  | 13 | 19 | - | 10.8143 9.74e- |
| 05 | 0.253 CTTCCCTG             |    |    |   |                |
| 1  | mm10_knownGene_uc008xlj.2  | 19 | 25 | + | 10.8143 9.74e- |
| 05 | 0.253 CTCCCTG              |    |    |   |                |
| 1  | mm10_knownGene_uc007hzz.1  | 13 | 19 | - | 10.8143 9.74e- |
| 05 | 0.253 CTTCCCTG             |    |    |   |                |
| 1  | mm10_knownGene_uc007nyb.1  | 19 | 25 | + | 10.8143 9.74e- |
| 05 | 0.253 CTCCCTG              |    |    |   |                |
| 1  | mm10_knownGene_uc007xpw.1  | 13 | 19 | - | 10.8143 9.74e- |
| 05 | 0.253 CTCCCTG              |    |    |   |                |
| 1  | mm10_knownGene_uc008tzd.1  | 19 | 25 | + | 10.8143 9.74e- |
| 05 | 0.253 CTCCCTG              |    |    |   |                |
| 1  | mm10_knownGene_uc007xpv.1  | 13 | 19 | - | 10.8143 9.74e- |
| 05 | 0.253 CTCCCTG              |    |    |   |                |
| 1  | mm10_knownGene_uc008csd.2  | 19 | 25 | + | 10.8143 9.74e- |
| 05 | 0.253 CTCCCTG              |    |    |   |                |
| 1  | mm10_knownGene_uc007vlp.2  | 13 | 19 | - | 10.8143 9.74e- |
| 05 | 0.253 CTCCCTG              |    |    |   |                |
| 1  | mm10_knownGene_uc009l zr.4 | 13 | 19 | - | 10.8143 9.74e- |
| 05 | 0.253 CTCCCTG              |    |    |   |                |
| 1  | mm10_knownGene_uc007iaa.1  | 13 | 19 | - | 10.8143 9.74e- |
| 05 | 0.253 CTTCCCTG             |    |    |   |                |
| 1  | mm10_knownGene_uc007feq.1  | 19 | 25 | + | 10.8143 9.74e- |
| 05 | 0.253 CTCCCTG              |    |    |   |                |
| 1  | mm10_knownGene_uc009mce.1  | 19 | 25 | + | 10.8143 9.74e- |
| 05 | 0.253 CTTCCCTG             |    |    |   |                |
| 1  | mm10_knownGene_uc009frk.2  | 19 | 25 | + | 10.8143 9.74e- |
| 05 | 0.253 CTCCCTG              |    |    |   |                |
| 1  | mm10_knownGene_uc009cob.1  | 19 | 25 | + | 10.8143 9.74e- |
| 05 | 0.253 CTTCCCTG             |    |    |   |                |
| 1  | mm10_knownGene_uc007duq.2  | 19 | 25 | + | 10.8143 9.74e- |
| 05 | 0.253 CTTCCCTG             |    |    |   |                |
| 1  | mm10_knownGene_uc007ddf.2  | 19 | 25 | + | 10.8143 9.74e- |
| 05 | 0.253 CTTCCCTG             |    |    |   |                |
| 1  | mm10_knownGene_uc012caj.1  | 13 | 19 | - | 10.8143 9.74e- |
| 05 | 0.253 CTCCCTG              |    |    |   |                |

|    |                           |    |    |   |                |
|----|---------------------------|----|----|---|----------------|
| 1  | mm10_knownGene_uc011yml.2 | 13 | 19 | - | 10.8143 9.74e- |
| 05 | 0.253 CTTCCCTG            |    |    |   |                |
| 1  | mm10_knownGene_uc029tsa.1 | 19 | 25 | + | 10.8143 9.74e- |
| 05 | 0.253 CTTCCCTG            |    |    |   |                |
| 1  | mm10_knownGene_uc056yej.1 | 19 | 25 | + | 10.8143 9.74e- |
| 05 | 0.253 CTTCCCTG            |    |    |   |                |
| 1  | mm10_knownGene_uc009lzs.2 | 13 | 19 | - | 10.8143 9.74e- |
| 05 | 0.253 CTCCCTG             |    |    |   |                |
| 1  | mm10_knownGene_uc029qrr.1 | 19 | 25 | + | 10.8143 9.74e- |
| 05 | 0.253 CTTCCCTG            |    |    |   |                |
| 1  | mm10_knownGene_uc007jgu.2 | 19 | 25 | + | 10.8143 9.74e- |
| 05 | 0.253 CTTCCCTG            |    |    |   |                |
| 1  | mm10_knownGene_uc009lzt.2 | 13 | 19 | - | 10.8143 9.74e- |
| 05 | 0.253 CTCCCTG             |    |    |   |                |
| 1  | mm10_knownGene_uc008yus.2 | 19 | 25 | + | 10.8143 9.74e- |
| 05 | 0.253 CTTCCCTG            |    |    |   |                |
| 1  | mm10_knownGene_uc008zov.1 | 13 | 19 | - | 10.8143 9.74e- |
| 05 | 0.253 CTTCCCTG            |    |    |   |                |
| 1  | mm10_knownGene_uc009hrf.2 | 19 | 25 | + | 10.8143 9.74e- |
| 05 | 0.253 CTCCCTG             |    |    |   |                |
| 1  | mm10_knownGene_uc008iry.1 | 19 | 25 | + | 10.8143 9.74e- |
| 05 | 0.253 CTTCCCTG            |    |    |   |                |
| 1  | mm10_knownGene_uc009qle.2 | 19 | 25 | + | 10.8143 9.74e- |
| 05 | 0.253 CTTCCCTG            |    |    |   |                |
| 1  | mm10_knownGene_uc007gif.1 | 13 | 19 | - | 10.8143 9.74e- |
| 05 | 0.253 CTTCCCTG            |    |    |   |                |
| 1  | mm10_knownGene_uc007asx.1 | 13 | 19 | - | 10.8143 9.74e- |
| 05 | 0.253 CTTCCCTG            |    |    |   |                |
| 1  | mm10_knownGene_uc007dde.2 | 19 | 25 | + | 10.8143 9.74e- |
| 05 | 0.253 CTTCCCTG            |    |    |   |                |
| 1  | mm10_knownGene_uc007jvc.1 | 13 | 19 | - | 10.8143 9.74e- |
| 05 | 0.253 CTTCCCTG            |    |    |   |                |
| 1  | mm10_knownGene_uc056ztv.1 | 19 | 25 | + | 10.8143 9.74e- |
| 05 | 0.253 CTTCCCTG            |    |    |   |                |
| 1  | mm10_knownGene_uc012dx.1  | 13 | 19 | - | 10.8143 9.74e- |
| 05 | 0.253 CTTCCCTG            |    |    |   |                |
| 1  | mm10_knownGene_uc008xfs.2 | 20 | 26 | + | 10.8143 9.74e- |
| 05 | 0.253 CTTCCCTG            |    |    |   |                |
| 1  | mm10_knownGene_uc029ssr.1 | 20 | 26 | + | 10.8143 9.74e- |
| 05 | 0.253 CTCCCTG             |    |    |   |                |
| 1  | mm10_knownGene_uc056yot.1 | 14 | 20 | - | 10.8143 9.74e- |
| 05 | 0.253 CTTCCCTG            |    |    |   |                |
| 1  | mm10_knownGene_uc008bjz.2 | 20 | 26 | + | 10.8143 9.74e- |
| 05 | 0.253 CTTCCCTG            |    |    |   |                |
| 1  | mm10_knownGene_uc008xug.2 | 20 | 26 | + | 10.8143 9.74e- |
| 05 | 0.253 CTCCCTG             |    |    |   |                |
| 1  | mm10_knownGene_uc012guh.1 | 20 | 26 | + | 10.8143 9.74e- |
| 05 | 0.253 CTTCCCTG            |    |    |   |                |
| 1  | mm10_knownGene_uc008zhw.2 | 14 | 20 | - | 10.8143 9.74e- |
| 05 | 0.253 CTTCCCTG            |    |    |   |                |
| 1  | mm10_knownGene_uc008stz.3 | 20 | 26 | + | 10.8143 9.74e- |
| 05 | 0.253 CTTCCCTG            |    |    |   |                |
| 1  | mm10_knownGene_uc008nxv.2 | 20 | 26 | + | 10.8143 9.74e- |
| 05 | 0.253 CTCCCTG             |    |    |   |                |
| 1  | mm10_knownGene_uc009jwy.1 | 14 | 20 | - | 10.8143 9.74e- |
| 05 | 0.253 CTTCCCTG            |    |    |   |                |
| 1  | mm10_knownGene_uc007wrr.2 | 20 | 26 | + | 10.8143 9.74e- |
| 05 | 0.253 CTTCCCTG            |    |    |   |                |
| 1  | mm10_knownGene_uc007pen.1 | 20 | 26 | + | 10.8143 9.74e- |
| 05 | 0.253 CTCCCTG             |    |    |   |                |
| 1  | mm10_knownGene_uc012dxj.1 | 20 | 26 | + | 10.8143 9.74e- |
| 05 | 0.253 CTCCCTG             |    |    |   |                |

|    |                           |    |    |   |                |
|----|---------------------------|----|----|---|----------------|
| 1  | mm10_knownGene_uc011ycw.1 | 14 | 20 | - | 10.8143 9.74e- |
| 05 | 0.253 CTTCCCTG            |    |    |   |                |
| 1  | mm10_knownGene_uc009fnl.2 | 14 | 20 | - | 10.8143 9.74e- |
| 05 | 0.253 CTCCCTG             |    |    |   |                |
| 1  | mm10_knownGene_uc007lot.1 | 14 | 20 | - | 10.8143 9.74e- |
| 05 | 0.253 CTTCCCTG            |    |    |   |                |
| 1  | mm10_knownGene_uc029rqp.1 | 20 | 26 | + | 10.8143 9.74e- |
| 05 | 0.253 CTTCCCTG            |    |    |   |                |
| 1  | mm10_knownGene_uc007rvv.2 | 20 | 26 | + | 10.8143 9.74e- |
| 05 | 0.253 CTTCCCTG            |    |    |   |                |
| 1  | mm10_knownGene_uc008jep.1 | 20 | 26 | + | 10.8143 9.74e- |
| 05 | 0.253 CTCCCTG             |    |    |   |                |
| 1  | mm10_knownGene_uc007kys.2 | 14 | 20 | - | 10.8143 9.74e- |
| 05 | 0.253 CTTCCCTG            |    |    |   |                |
| 1  | mm10_knownGene_uc007wrp.2 | 20 | 26 | + | 10.8143 9.74e- |
| 05 | 0.253 CTTCCCTG            |    |    |   |                |
| 1  | mm10_knownGene_uc007lou.1 | 14 | 20 | - | 10.8143 9.74e- |
| 05 | 0.253 CTTCCCTG            |    |    |   |                |
| 1  | mm10_knownGene_uc009haq.1 | 20 | 26 | + | 10.8143 9.74e- |
| 05 | 0.253 CTCCCTG             |    |    |   |                |
| 1  | mm10_knownGene_uc008zhx.2 | 14 | 20 | - | 10.8143 9.74e- |
| 05 | 0.253 CTTCCCTG            |    |    |   |                |
| 1  | mm10_knownGene_uc011yfl.1 | 14 | 20 | - | 10.8143 9.74e- |
| 05 | 0.253 CTTCCCTG            |    |    |   |                |
| 1  | mm10_knownGene_uc007qkn.1 | 14 | 20 | - | 10.8143 9.74e- |
| 05 | 0.253 CTTCCCTG            |    |    |   |                |
| 1  | mm10_knownGene_uc008bzk.2 | 20 | 26 | + | 10.8143 9.74e- |
| 05 | 0.253 CTTCCCTG            |    |    |   |                |
| 1  | mm10_knownGene_uc057arj.1 | 14 | 20 | - | 10.8143 9.74e- |
| 05 | 0.253 CTTCCCTG            |    |    |   |                |
| 1  | mm10_knownGene_uc057ark.1 | 14 | 20 | - | 10.8143 9.74e- |
| 05 | 0.253 CTTCCCTG            |    |    |   |                |
| 1  | mm10_knownGene_uc009pwm.2 | 20 | 26 | + | 10.8143 9.74e- |
| 05 | 0.253 CTTCCCTG            |    |    |   |                |
| 1  | mm10_knownGene_uc029xhd.2 | 20 | 26 | + | 10.8143 9.74e- |
| 05 | 0.253 CTTCCCTG            |    |    |   |                |
| 1  | mm10_knownGene_uc007wro.2 | 20 | 26 | + | 10.8143 9.74e- |
| 05 | 0.253 CTTCCCTG            |    |    |   |                |
| 1  | mm10_knownGene_uc007kyr.2 | 14 | 20 | - | 10.8143 9.74e- |
| 05 | 0.253 CTTCCCTG            |    |    |   |                |
| 1  | mm10_knownGene_uc012apj.2 | 20 | 26 | + | 10.8143 9.74e- |
| 05 | 0.253 CTTCCCTG            |    |    |   |                |
| 1  | mm10_knownGene_uc057arl.1 | 14 | 20 | - | 10.8143 9.74e- |
| 05 | 0.253 CTTCCCTG            |    |    |   |                |
| 1  | mm10_knownGene_uc029uvl.1 | 20 | 26 | + | 10.8143 9.74e- |
| 05 | 0.253 CTTCCCTG            |    |    |   |                |
| 1  | mm10_knownGene_uc011ycv.1 | 14 | 20 | - | 10.8143 9.74e- |
| 05 | 0.253 CTTCCCTG            |    |    |   |                |
| 1  | mm10_knownGene_uc007wrq.2 | 20 | 26 | + | 10.8143 9.74e- |
| 05 | 0.253 CTTCCCTG            |    |    |   |                |
| 1  | mm10_knownGene_uc008bzi.2 | 20 | 26 | + | 10.8143 9.74e- |
| 05 | 0.253 CTTCCCTG            |    |    |   |                |
| 1  | mm10_knownGene_uc012fxj.1 | 14 | 20 | - | 10.8143 9.74e- |
| 05 | 0.253 CTCCCTG             |    |    |   |                |
| 1  | mm10_knownGene_uc008xfr.2 | 20 | 26 | + | 10.8143 9.74e- |
| 05 | 0.253 CTTCCCTG            |    |    |   |                |
| 1  | mm10_knownGene_uc011zvw.2 | 20 | 26 | + | 10.8143 9.74e- |
| 05 | 0.253 CTTCCCTG            |    |    |   |                |
| 1  | mm10_knownGene_uc009jwz.1 | 14 | 20 | - | 10.8143 9.74e- |
| 05 | 0.253 CTTCCCTG            |    |    |   |                |
| 1  | mm10_knownGene_uc033ibs.1 | 15 | 21 | - | 10.8143 9.74e- |
| 05 | 0.253 CTCCCTG             |    |    |   |                |

|    |                           |    |    |   |                |
|----|---------------------------|----|----|---|----------------|
| 1  | mm10_knownGene_uc008eiz.1 | 21 | 27 | + | 10.8143 9.74e- |
| 05 | 0.253 CTTCCCTG            |    |    |   |                |
| 1  | mm10_knownGene_uc007eyv.2 | 15 | 21 | - | 10.8143 9.74e- |
| 05 | 0.253 CTTCCCTG            |    |    |   |                |
| 1  | mm10_knownGene_uc007eyu.2 | 15 | 21 | - | 10.8143 9.74e- |
| 05 | 0.253 CTTCCCTG            |    |    |   |                |
| 1  | mm10_knownGene_uc008sqk.1 | 15 | 21 | - | 10.8143 9.74e- |
| 05 | 0.253 CTTCCCTG            |    |    |   |                |
| 1  | mm10_knownGene_uc009pwu.1 | 15 | 21 | - | 10.8143 9.74e- |
| 05 | 0.253 CTTCCCTG            |    |    |   |                |
| 1  | mm10_knownGene_uc009hvp.1 | 21 | 27 | + | 10.8143 9.74e- |
| 05 | 0.253 CTTCCCTG            |    |    |   |                |
| 1  | mm10_knownGene_uc007wor.1 | 21 | 27 | + | 10.8143 9.74e- |
| 05 | 0.253 CTTCCCTG            |    |    |   |                |
| 1  | mm10_knownGene_uc008eja.1 | 21 | 27 | + | 10.8143 9.74e- |
| 05 | 0.253 CTTCCCTG            |    |    |   |                |
| 1  | mm10_knownGene_uc033fwy.1 | 21 | 27 | + | 10.8143 9.74e- |
| 05 | 0.253 CTTCCCTG            |    |    |   |                |
| 1  | mm10_knownGene_uc007wia.1 | 15 | 21 | - | 10.8143 9.74e- |
| 05 | 0.253 CTTCCCTG            |    |    |   |                |
| 1  | mm10_knownGene_uc009ass.1 | 15 | 21 | - | 10.8143 9.74e- |
| 05 | 0.253 CTTCCCTG            |    |    |   |                |
| 1  | mm10_knownGene_uc008vrc.1 | 21 | 27 | + | 10.8143 9.74e- |
| 05 | 0.253 CTTCCCTG            |    |    |   |                |
| 1  | mm10_knownGene_uc007cco.1 | 21 | 27 | + | 10.8143 9.74e- |
| 05 | 0.253 CTTCCCTG            |    |    |   |                |
| 1  | mm10_knownGene_uc007elg.1 | 15 | 21 | - | 10.8143 9.74e- |
| 05 | 0.253 CTTCCCTG            |    |    |   |                |
| 1  | mm10_knownGene_uc012ejd.1 | 21 | 27 | + | 10.8143 9.74e- |
| 05 | 0.253 CTTCCCTG            |    |    |   |                |
| 1  | mm10_knownGene_uc033idy.1 | 15 | 21 | - | 10.8143 9.74e- |
| 05 | 0.253 CTTCCCTG            |    |    |   |                |
| 1  | mm10_knownGene_uc029wna.1 | 21 | 27 | + | 10.8143 9.74e- |
| 05 | 0.253 CTTCCCTG            |    |    |   |                |
| 1  | mm10_knownGene_uc033gfv.1 | 15 | 21 | - | 10.8143 9.74e- |
| 05 | 0.253 CTTCCCTG            |    |    |   |                |
| 1  | mm10_knownGene_uc033idx.1 | 15 | 21 | - | 10.8143 9.74e- |
| 05 | 0.253 CTTCCCTG            |    |    |   |                |
| 1  | mm10_knownGene_uc011yip.1 | 21 | 27 | + | 10.8143 9.74e- |
| 05 | 0.253 CTTCCCTG            |    |    |   |                |
| 1  | mm10_knownGene_uc009kzi.1 | 21 | 27 | + | 10.8143 9.74e- |
| 05 | 0.253 CTTCCCTG            |    |    |   |                |
| 1  | mm10_knownGene_uc029tzw.1 | 15 | 21 | - | 10.8143 9.74e- |
| 05 | 0.253 CTTCCCTG            |    |    |   |                |
| 1  | mm10_knownGene_uc007hju.1 | 21 | 27 | + | 10.8143 9.74e- |
| 05 | 0.253 CTTCCCTG            |    |    |   |                |
| 1  | mm10_knownGene_uc012hls.1 | 15 | 21 | - | 10.8143 9.74e- |
| 05 | 0.253 CTTCCCTG            |    |    |   |                |
| 1  | mm10_knownGene_uc009nlf.1 | 21 | 27 | + | 10.8143 9.74e- |
| 05 | 0.253 CTTCCCTG            |    |    |   |                |
| 1  | mm10_knownGene_uc029tmd.1 | 21 | 27 | + | 10.8143 9.74e- |
| 05 | 0.253 CTTCCCTG            |    |    |   |                |
| 1  | mm10_knownGene_uc008fza.1 | 15 | 21 | - | 10.8143 9.74e- |
| 05 | 0.253 CTTCCCTG            |    |    |   |                |
| 1  | mm10_knownGene_uc029vkz.1 | 15 | 21 | - | 10.8143 9.74e- |
| 05 | 0.253 CTTCCCTG            |    |    |   |                |
| 1  | mm10_knownGene_uc008mai.2 | 22 | 28 | + | 10.8143 9.74e- |
| 05 | 0.253 CTTCCCTG            |    |    |   |                |
| 1  | mm10_knownGene_uc009ssk.2 | 16 | 22 | - | 10.8143 9.74e- |
| 05 | 0.253 CTTCCCTG            |    |    |   |                |
| 1  | mm10_knownGene_uc009ssm.2 | 16 | 22 | - | 10.8143 9.74e- |
| 05 | 0.253 CTTCCCTG            |    |    |   |                |



|    |                           |    |    |   |                |
|----|---------------------------|----|----|---|----------------|
| 1  | mm10_knownGene_uc007qko.2 | 22 | 28 | + | 10.8143 9.74e- |
| 05 | 0.253 CTTCCTG             |    |    |   |                |
| 1  | mm10_knownGene_uc008mim.1 | 16 | 22 | - | 10.8143 9.74e- |
| 05 | 0.253 CTCCCTG             |    |    |   |                |
| 1  | mm10_knownGene_uc029qxl.1 | 22 | 28 | + | 10.8143 9.74e- |
| 05 | 0.253 CTTCCTG             |    |    |   |                |
| 1  | mm10_knownGene_uc009hze.1 | 16 | 22 | - | 10.8143 9.74e- |
| 05 | 0.253 CTCCCTG             |    |    |   |                |
| 1  | mm10_knownGene_uc008jam.2 | 16 | 22 | - | 10.8143 9.74e- |
| 05 | 0.253 CTCCCTG             |    |    |   |                |
| 1  | mm10_knownGene_uc007mfj.1 | 22 | 28 | + | 10.8143 9.74e- |
| 05 | 0.253 CTCCCTG             |    |    |   |                |
| 1  | mm10_knownGene_uc008oao.2 | 22 | 28 | + | 10.8143 9.74e- |
| 05 | 0.253 CTCCCTG             |    |    |   |                |
| 1  | mm10_knownGene_uc007uan.2 | 22 | 28 | + | 10.8143 9.74e- |
| 05 | 0.253 CTTCCTG             |    |    |   |                |
| 1  | mm10_knownGene_uc009ssn.2 | 16 | 22 | - | 10.8143 9.74e- |
| 05 | 0.253 CTTCCTG             |    |    |   |                |
| 1  | mm10_knownGene_uc011xng.1 | 16 | 22 | - | 10.8143 9.74e- |
| 05 | 0.253 CTTCCTG             |    |    |   |                |
| 1  | mm10_knownGene_uc033inw.1 | 22 | 28 | + | 10.8143 9.74e- |
| 05 | 0.253 CTTCCTG             |    |    |   |                |
| 1  | mm10_knownGene_uc029rfu.1 | 22 | 28 | + | 10.8143 9.74e- |
| 05 | 0.253 CTCCCTG             |    |    |   |                |
| 1  | mm10_knownGene_uc007gsw.2 | 22 | 28 | + | 10.8143 9.74e- |
| 05 | 0.253 CTTCCTG             |    |    |   |                |
| 1  | mm10_knownGene_uc007dyn.2 | 22 | 28 | + | 10.8143 9.74e- |
| 05 | 0.253 CTCCCTG             |    |    |   |                |
| 1  | mm10_knownGene_uc009qur.2 | 16 | 22 | - | 10.8143 9.74e- |
| 05 | 0.253 CTTCCTG             |    |    |   |                |
| 1  | mm10_knownGene_uc029wiw.1 | 16 | 22 | - | 10.8143 9.74e- |
| 05 | 0.253 CTCCCTG             |    |    |   |                |
| 1  | mm10_knownGene_uc007eam.2 | 16 | 22 | - | 10.8143 9.74e- |
| 05 | 0.253 CTTCCTG             |    |    |   |                |
| 1  | mm10_knownGene_uc009mhf.1 | 22 | 28 | + | 10.8143 9.74e- |
| 05 | 0.253 CTTCCTG             |    |    |   |                |
| 1  | mm10_knownGene_uc007ipa.1 | 22 | 28 | + | 10.8143 9.74e- |
| 05 | 0.253 CTTCCTG             |    |    |   |                |
| 1  | mm10_knownGene_uc008pyj.1 | 22 | 28 | + | 10.8143 9.74e- |
| 05 | 0.253 CTCCCTG             |    |    |   |                |
| 1  | mm10_knownGene_uc008fdi.1 | 22 | 28 | + | 10.8143 9.74e- |
| 05 | 0.253 CTTCCTG             |    |    |   |                |
| 1  | mm10_knownGene_uc007fhc.1 | 22 | 28 | + | 10.8143 9.74e- |
| 05 | 0.253 CTTCCTG             |    |    |   |                |
| 1  | mm10_knownGene_uc007knw.1 | 16 | 22 | - | 10.8143 9.74e- |
| 05 | 0.253 CTCCCTG             |    |    |   |                |
| 1  | mm10_knownGene_uc008srn.2 | 22 | 28 | + | 10.8143 9.74e- |
| 05 | 0.253 CTTCCTG             |    |    |   |                |
| 1  | mm10_knownGene_uc007mnl.1 | 16 | 22 | - | 10.8143 9.74e- |
| 05 | 0.253 CTTCCTG             |    |    |   |                |
| 1  | mm10_knownGene_uc009qen.2 | 16 | 22 | - | 10.8143 9.74e- |
| 05 | 0.253 CTTCCTG             |    |    |   |                |
| 1  | mm10_knownGene_uc009qem.2 | 16 | 22 | - | 10.8143 9.74e- |
| 05 | 0.253 CTTCCTG             |    |    |   |                |
| 1  | mm10_knownGene_uc029vnr.1 | 16 | 22 | - | 10.8143 9.74e- |
| 05 | 0.253 CTCCCTG             |    |    |   |                |
| 1  | mm10_knownGene_uc009ssj.2 | 16 | 22 | - | 10.8143 9.74e- |
| 05 | 0.253 CTTCCTG             |    |    |   |                |
| 1  | mm10_knownGene_uc008azo.2 | 22 | 28 | + | 10.8143 9.74e- |
| 05 | 0.253 CTTCCTG             |    |    |   |                |
| 1  | mm10_knownGene_uc008hgs.1 | 22 | 28 | + | 10.8143 9.74e- |
| 05 | 0.253 CTTCCTG             |    |    |   |                |

|    |                           |    |    |   |                |
|----|---------------------------|----|----|---|----------------|
| 1  | mm10_knownGene_uc007ipb.1 | 22 | 28 | + | 10.8143 9.74e- |
| 05 | 0.253 CTTCCTG             |    |    |   |                |
| 1  | mm10_knownGene_uc009ssl.2 | 16 | 22 | - | 10.8143 9.74e- |
| 05 | 0.253 CTTCCTG             |    |    |   |                |
| 1  | mm10_knownGene_uc009gln.2 | 17 | 23 | - | 10.8143 9.74e- |
| 05 | 0.253 CTTCCTG             |    |    |   |                |
| 1  | mm10_knownGene_uc007neh.1 | 17 | 23 | - | 10.8143 9.74e- |
| 05 | 0.253 CTCCCTG             |    |    |   |                |
| 1  | mm10_knownGene_uc009min.2 | 23 | 29 | + | 10.8143 9.74e- |
| 05 | 0.253 CTCCCTG             |    |    |   |                |
| 1  | mm10_knownGene_uc007tuz.3 | 23 | 29 | + | 10.8143 9.74e- |
| 05 | 0.253 CTCCCTG             |    |    |   |                |
| 1  | mm10_knownGene_uc008lem.2 | 17 | 23 | - | 10.8143 9.74e- |
| 05 | 0.253 CTCCCTG             |    |    |   |                |
| 1  | mm10_knownGene_uc029tef.1 | 17 | 23 | - | 10.8143 9.74e- |
| 05 | 0.253 CTTCCTG             |    |    |   |                |
| 1  | mm10_knownGene_uc007hbx.2 | 17 | 23 | - | 10.8143 9.74e- |
| 05 | 0.253 CTTCCTG             |    |    |   |                |
| 1  | mm10_knownGene_uc012bym.1 | 23 | 29 | + | 10.8143 9.74e- |
| 05 | 0.253 CTTCCTG             |    |    |   |                |
| 1  | mm10_knownGene_uc009nqd.1 | 23 | 29 | + | 10.8143 9.74e- |
| 05 | 0.253 CTTCCTG             |    |    |   |                |
| 1  | mm10_knownGene_uc008wcz.1 | 17 | 23 | - | 10.8143 9.74e- |
| 05 | 0.253 CTTCCTG             |    |    |   |                |
| 1  | mm10_knownGene_uc007icg.2 | 17 | 23 | - | 10.8143 9.74e- |
| 05 | 0.253 CTTCCTG             |    |    |   |                |
| 1  | mm10_knownGene_uc029vdz.1 | 23 | 29 | + | 10.8143 9.74e- |
| 05 | 0.253 CTTCCTG             |    |    |   |                |
| 1  | mm10_knownGene_uc009hah.2 | 17 | 23 | - | 10.8143 9.74e- |
| 05 | 0.253 CTTCCTG             |    |    |   |                |
| 1  | mm10_knownGene_uc009glm.2 | 17 | 23 | - | 10.8143 9.74e- |
| 05 | 0.253 CTTCCTG             |    |    |   |                |
| 1  | mm10_knownGene_uc009nqe.1 | 23 | 29 | + | 10.8143 9.74e- |
| 05 | 0.253 CTTCCTG             |    |    |   |                |
| 1  | mm10_knownGene_uc057brw.1 | 23 | 29 | + | 10.8143 9.74e- |
| 05 | 0.253 CTCCCTG             |    |    |   |                |
| 1  | mm10_knownGene_uc008agl.3 | 23 | 29 | + | 10.8143 9.74e- |
| 05 | 0.253 CTCCCTG             |    |    |   |                |
| 1  | mm10_knownGene_uc008xfe.1 | 23 | 29 | + | 10.8143 9.74e- |
| 05 | 0.253 CTCCCTG             |    |    |   |                |
| 1  | mm10_knownGene_uc007gps.1 | 17 | 23 | - | 10.8143 9.74e- |
| 05 | 0.253 CTTCCTG             |    |    |   |                |
| 1  | mm10_knownGene_uc007icf.2 | 17 | 23 | - | 10.8143 9.74e- |
| 05 | 0.253 CTTCCTG             |    |    |   |                |
| 1  | mm10_knownGene_uc033fpd.1 | 23 | 29 | + | 10.8143 9.74e- |
| 05 | 0.253 CTTCCTG             |    |    |   |                |
| 1  | mm10_knownGene_uc008tpf.2 | 17 | 23 | - | 10.8143 9.74e- |
| 05 | 0.253 CTTCCTG             |    |    |   |                |
| 1  | mm10_knownGene_uc007gli.1 | 17 | 23 | - | 10.8143 9.74e- |
| 05 | 0.253 CTTCCTG             |    |    |   |                |
| 1  | mm10_knownGene_uc009ndg.1 | 23 | 29 | + | 10.8143 9.74e- |
| 05 | 0.253 CTCCCTG             |    |    |   |                |
| 1  | mm10_knownGene_uc008kgk.2 | 23 | 29 | + | 10.8143 9.74e- |
| 05 | 0.253 CTTCCTG             |    |    |   |                |
| 1  | mm10_knownGene_uc007pyg.1 | 17 | 23 | - | 10.8143 9.74e- |
| 05 | 0.253 CTCCCTG             |    |    |   |                |
| 1  | mm10_knownGene_uc007dsn.2 | 17 | 23 | - | 10.8143 9.74e- |
| 05 | 0.253 CTTCCTG             |    |    |   |                |
| 1  | mm10_knownGene_uc056yrg.1 | 23 | 29 | + | 10.8143 9.74e- |
| 05 | 0.253 CTTCCTG             |    |    |   |                |
| 1  | mm10_knownGene_uc007xgo.2 | 23 | 29 | + | 10.8143 9.74e- |
| 05 | 0.253 CTCCCTG             |    |    |   |                |

|    |                           |    |    |   |                |
|----|---------------------------|----|----|---|----------------|
| 1  | mm10_knownGene_uc008yjm.1 | 23 | 29 | + | 10.8143 9.74e- |
| 05 | 0.253 CTTCCTG             |    |    |   |                |
| 1  | mm10_knownGene_uc033hug.1 | 23 | 29 | + | 10.8143 9.74e- |
| 05 | 0.253 CTCCCTG             |    |    |   |                |
| 1  | mm10_knownGene_uc033gbw.1 | 23 | 29 | + | 10.8143 9.74e- |
| 05 | 0.253 CTTCCTG             |    |    |   |                |
| 1  | mm10_knownGene_uc008hxd.2 | 17 | 23 | - | 10.8143 9.74e- |
| 05 | 0.253 CTCCCTG             |    |    |   |                |
| 1  | mm10_knownGene_uc008hxc.2 | 17 | 23 | - | 10.8143 9.74e- |
| 05 | 0.253 CTCCCTG             |    |    |   |                |
| 1  | mm10_knownGene_uc007ecg.1 | 23 | 29 | + | 10.8143 9.74e- |
| 05 | 0.253 CTTCCTG             |    |    |   |                |
| 1  | mm10_knownGene_uc008faa.2 | 23 | 29 | + | 10.8143 9.74e- |
| 05 | 0.253 CTTCCTG             |    |    |   |                |
| 1  | mm10_knownGene_uc029xns.1 | 17 | 23 | - | 10.8143 9.74e- |
| 05 | 0.253 CTCCCTG             |    |    |   |                |
| 1  | mm10_knownGene_uc029sye.1 | 17 | 23 | - | 10.8143 9.74e- |
| 05 | 0.253 CTTCCTG             |    |    |   |                |
| 1  | mm10_knownGene_uc029ute.1 | 23 | 29 | + | 10.8143 9.74e- |
| 05 | 0.253 CTTCCTG             |    |    |   |                |
| 1  | mm10_knownGene_uc009nqf.1 | 23 | 29 | + | 10.8143 9.74e- |
| 05 | 0.253 CTTCCTG             |    |    |   |                |
| 1  | mm10_knownGene_uc008ngz.1 | 17 | 23 | - | 10.8143 9.74e- |
| 05 | 0.253 CTCCCTG             |    |    |   |                |
| 1  | mm10_knownGene_uc008qrg.2 | 23 | 29 | + | 10.8143 9.74e- |
| 05 | 0.253 CTTCCTG             |    |    |   |                |
| 1  | mm10_knownGene_uc009gll.2 | 17 | 23 | - | 10.8143 9.74e- |
| 05 | 0.253 CTTCCTG             |    |    |   |                |
| 1  | mm10_knownGene_uc007dat.1 | 17 | 23 | - | 10.8143 9.74e- |
| 05 | 0.253 CTTCCTG             |    |    |   |                |
| 1  | mm10_knownGene_uc007oon.2 | 17 | 23 | - | 10.8143 9.74e- |
| 05 | 0.253 CTTCCTG             |    |    |   |                |
| 1  | mm10_knownGene_uc007qcr.2 | 23 | 29 | + | 10.8143 9.74e- |
| 05 | 0.253 CTTCCTG             |    |    |   |                |
| 1  | mm10_knownGene_uc029usb.1 | 23 | 29 | + | 10.8143 9.74e- |
| 05 | 0.253 CTTCCTG             |    |    |   |                |
| 1  | mm10_knownGene_uc008pmn.3 | 23 | 29 | + | 10.8143 9.74e- |
| 05 | 0.253 CTCCCTG             |    |    |   |                |
| 1  | mm10_knownGene_uc029tnd.1 | 23 | 29 | + | 10.8143 9.74e- |
| 05 | 0.253 CTTCCTG             |    |    |   |                |
| 1  | mm10_knownGene_uc029tgf.1 | 24 | 30 | + | 10.8143 9.74e- |
| 05 | 0.253 CTCCCTG             |    |    |   |                |
| 1  | mm10_knownGene_uc009mjx.2 | 18 | 24 | - | 10.8143 9.74e- |
| 05 | 0.253 CTCCCTG             |    |    |   |                |
| 1  | mm10_knownGene_uc033ibp.1 | 24 | 30 | + | 10.8143 9.74e- |
| 05 | 0.253 CTTCCTG             |    |    |   |                |
| 1  | mm10_knownGene_uc012hha.1 | 18 | 24 | - | 10.8143 9.74e- |
| 05 | 0.253 CTCCCTG             |    |    |   |                |
| 1  | mm10_knownGene_uc008she.1 | 18 | 24 | - | 10.8143 9.74e- |
| 05 | 0.253 CTCCCTG             |    |    |   |                |
| 1  | mm10_knownGene_uc008ulz.2 | 24 | 30 | + | 10.8143 9.74e- |
| 05 | 0.253 CTTCCTG             |    |    |   |                |
| 1  | mm10_knownGene_uc029ukd.1 | 24 | 30 | + | 10.8143 9.74e- |
| 05 | 0.253 CTCCCTG             |    |    |   |                |
| 1  | mm10_knownGene_uc008edn.2 | 18 | 24 | - | 10.8143 9.74e- |
| 05 | 0.253 CTCCCTG             |    |    |   |                |
| 1  | mm10_knownGene_uc008ods.1 | 18 | 24 | - | 10.8143 9.74e- |
| 05 | 0.253 CTCCCTG             |    |    |   |                |
| 1  | mm10_knownGene_uc029smk.1 | 18 | 24 | - | 10.8143 9.74e- |
| 05 | 0.253 CTTCCTG             |    |    |   |                |
| 1  | mm10_knownGene_uc007nbt.2 | 24 | 30 | + | 10.8143 9.74e- |
| 05 | 0.253 CTCCCTG             |    |    |   |                |

|    |                           |    |    |   |                |
|----|---------------------------|----|----|---|----------------|
| 1  | mm10_knownGene_uc029srv.1 | 18 | 24 | - | 10.8143 9.74e- |
| 05 | 0.253 CTTCCTG             |    |    |   |                |
| 1  | mm10_knownGene_uc008sjs.2 | 24 | 30 | + | 10.8143 9.74e- |
| 05 | 0.253 CTTCCTG             |    |    |   |                |
| 1  | mm10_knownGene_uc008ord.4 | 24 | 30 | + | 10.8143 9.74e- |
| 05 | 0.253 CTCCCTG             |    |    |   |                |
| 1  | mm10_knownGene_uc009hte.2 | 24 | 30 | + | 10.8143 9.74e- |
| 05 | 0.253 CTTCCTG             |    |    |   |                |
| 1  | mm10_knownGene_uc009ghm.2 | 24 | 30 | + | 10.8143 9.74e- |
| 05 | 0.253 CTTCCTG             |    |    |   |                |
| 1  | mm10_knownGene_uc008uly.2 | 24 | 30 | + | 10.8143 9.74e- |
| 05 | 0.253 CTTCCTG             |    |    |   |                |
| 1  | mm10_knownGene_uc007nbv.1 | 24 | 30 | + | 10.8143 9.74e- |
| 05 | 0.253 CTCCCTG             |    |    |   |                |
| 1  | mm10_knownGene_uc007nbu.2 | 24 | 30 | + | 10.8143 9.74e- |
| 05 | 0.253 CTCCCTG             |    |    |   |                |
| 1  | mm10_knownGene_uc009eex.2 | 18 | 24 | - | 10.8143 9.74e- |
| 05 | 0.253 CTCCCTG             |    |    |   |                |
| 1  | mm10_knownGene_uc007nbs.2 | 24 | 30 | + | 10.8143 9.74e- |
| 05 | 0.253 CTCCCTG             |    |    |   |                |
| 1  | mm10_knownGene_uc007iyw.2 | 24 | 30 | + | 10.8143 9.74e- |
| 05 | 0.253 CTCCCTG             |    |    |   |                |
| 1  | mm10_knownGene_uc008ore.4 | 24 | 30 | + | 10.8143 9.74e- |
| 05 | 0.253 CTCCCTG             |    |    |   |                |
| 1  | mm10_knownGene_uc008sfy.2 | 24 | 30 | + | 10.8143 9.74e- |
| 05 | 0.253 CTTCCTG             |    |    |   |                |
| 1  | mm10_knownGene_uc008edp.2 | 18 | 24 | - | 10.8143 9.74e- |
| 05 | 0.253 CTCCCTG             |    |    |   |                |
| 1  | mm10_knownGene_uc007umi.2 | 24 | 30 | + | 10.8143 9.74e- |
| 05 | 0.253 CTCCCTG             |    |    |   |                |
| 1  | mm10_knownGene_uc012dot.1 | 18 | 24 | - | 10.8143 9.74e- |
| 05 | 0.253 CTCCCTG             |    |    |   |                |
| 1  | mm10_knownGene_uc009cla.2 | 18 | 24 | - | 10.8143 9.74e- |
| 05 | 0.253 CTTCCTG             |    |    |   |                |
| 1  | mm10_knownGene_uc007ctn.1 | 24 | 30 | + | 10.8143 9.74e- |
| 05 | 0.253 CTTCCTG             |    |    |   |                |
| 1  | mm10_knownGene_uc007uuq.1 | 24 | 30 | + | 10.8143 9.74e- |
| 05 | 0.253 CTTCCTG             |    |    |   |                |
| 1  | mm10_knownGene_uc029tgi.1 | 18 | 24 | - | 10.8143 9.74e- |
| 05 | 0.253 CTCCCTG             |    |    |   |                |
| 1  | mm10_knownGene_uc007upc.1 | 18 | 24 | - | 10.8143 9.74e- |
| 05 | 0.253 CTTCCTG             |    |    |   |                |
| 1  | mm10_knownGene_uc008wsm.2 | 18 | 24 | - | 10.8143 9.74e- |
| 05 | 0.253 CTCCCTG             |    |    |   |                |
| 1  | mm10_knownGene_uc029sle.1 | 24 | 30 | + | 10.8143 9.74e- |
| 05 | 0.253 CTCCCTG             |    |    |   |                |
| 1  | mm10_knownGene_uc007ohb.1 | 24 | 30 | + | 10.8143 9.74e- |
| 05 | 0.253 CTCCCTG             |    |    |   |                |
| 1  | mm10_knownGene_uc008sfz.1 | 24 | 30 | + | 10.8143 9.74e- |
| 05 | 0.253 CTTCCTG             |    |    |   |                |
| 1  | mm10_knownGene_uc008ulx.2 | 24 | 30 | + | 10.8143 9.74e- |
| 05 | 0.253 CTTCCTG             |    |    |   |                |
| 1  | mm10_knownGene_uc008vrh.1 | 18 | 24 | - | 10.8143 9.74e- |
| 05 | 0.253 CTCCCTG             |    |    |   |                |
| 1  | mm10_knownGene_uc008ulw.2 | 24 | 30 | + | 10.8143 9.74e- |
| 05 | 0.253 CTTCCTG             |    |    |   |                |
| 1  | mm10_knownGene_uc009hrn.2 | 24 | 30 | + | 10.8143 9.74e- |
| 05 | 0.253 CTTCCTG             |    |    |   |                |
| 1  | mm10_knownGene_uc008dvt.2 | 18 | 24 | - | 10.8143 9.74e- |
| 05 | 0.253 CTTCCTG             |    |    |   |                |
| 1  | mm10_knownGene_uc008sjr.2 | 24 | 30 | + | 10.8143 9.74e- |
| 05 | 0.253 CTTCCTG             |    |    |   |                |

|    |                           |    |    |   |                |
|----|---------------------------|----|----|---|----------------|
| 1  | mm10_knownGene_uc007xgj.2 | 18 | 24 | - | 10.8143 9.74e- |
| 05 | 0.253 CTTCCCTG            |    |    |   |                |
| 1  | mm10_knownGene_uc008unk.1 | 18 | 24 | - | 10.8143 9.74e- |
| 05 | 0.253 CTTCCCTG            |    |    |   |                |
| 1  | mm10_knownGene_uc008cnu.1 | 18 | 24 | - | 10.8143 9.74e- |
| 05 | 0.253 CTCCCTG             |    |    |   |                |
| 1  | mm10_knownGene_uc012aqi.2 | 24 | 30 | + | 10.8143 9.74e- |
| 05 | 0.253 CTTCCCTG            |    |    |   |                |
| 1  | mm10_knownGene_uc008blx.2 | 18 | 24 | - | 10.8143 9.74e- |
| 05 | 0.253 CTTCCCTG            |    |    |   |                |
| 1  | mm10_knownGene_uc029uke.1 | 24 | 30 | + | 10.8143 9.74e- |
| 05 | 0.253 CTCCCTG             |    |    |   |                |
| 1  | mm10_knownGene_uc029vtk.1 | 24 | 30 | + | 10.8143 9.74e- |
| 05 | 0.253 CTTCCCTG            |    |    |   |                |
| 1  | mm10_knownGene_uc029ulh.1 | 19 | 25 | - | 10.8143 9.74e- |
| 05 | 0.253 CTCCCTG             |    |    |   |                |
| 1  | mm10_knownGene_uc009fle.2 | 19 | 25 | - | 10.8143 9.74e- |
| 05 | 0.253 CTCCCTG             |    |    |   |                |
| 1  | mm10_knownGene_uc029tri.1 | 25 | 31 | + | 10.8143 9.74e- |
| 05 | 0.253 CTTCCCTG            |    |    |   |                |
| 1  | mm10_knownGene_uc029uwr.1 | 25 | 31 | + | 10.8143 9.74e- |
| 05 | 0.253 CTTCCCTG            |    |    |   |                |
| 1  | mm10_knownGene_uc007gsc.1 | 25 | 31 | + | 10.8143 9.74e- |
| 05 | 0.253 CTTCCCTG            |    |    |   |                |
| 1  | mm10_knownGene_uc033iww.1 | 19 | 25 | - | 10.8143 9.74e- |
| 05 | 0.253 CTCCCTG             |    |    |   |                |
| 1  | mm10_knownGene_uc008fei.1 | 25 | 31 | + | 10.8143 9.74e- |
| 05 | 0.253 CTTCCCTG            |    |    |   |                |
| 1  | mm10_knownGene_uc007ntg.2 | 25 | 31 | + | 10.8143 9.74e- |
| 05 | 0.253 CTTCCCTG            |    |    |   |                |
| 1  | mm10_knownGene_uc008ayo.2 | 25 | 31 | + | 10.8143 9.74e- |
| 05 | 0.253 CTTCCCTG            |    |    |   |                |
| 1  | mm10_knownGene_uc008fej.1 | 25 | 31 | + | 10.8143 9.74e- |
| 05 | 0.253 CTTCCCTG            |    |    |   |                |
| 1  | mm10_knownGene_uc033imn.1 | 19 | 25 | - | 10.8143 9.74e- |
| 05 | 0.253 CTTCCCTG            |    |    |   |                |
| 1  | mm10_knownGene_uc007pbv.1 | 19 | 25 | - | 10.8143 9.74e- |
| 05 | 0.253 CTCCCTG             |    |    |   |                |
| 1  | mm10_knownGene_uc007pby.1 | 19 | 25 | - | 10.8143 9.74e- |
| 05 | 0.253 CTCCCTG             |    |    |   |                |
| 1  | mm10_knownGene_uc007mqq.2 | 25 | 31 | + | 10.8143 9.74e- |
| 05 | 0.253 CTTCCCTG            |    |    |   |                |
| 1  | mm10_knownGene_uc029wvu.1 | 19 | 25 | - | 10.8143 9.74e- |
| 05 | 0.253 CTTCCCTG            |    |    |   |                |
| 1  | mm10_knownGene_uc007ntj.2 | 25 | 31 | + | 10.8143 9.74e- |
| 05 | 0.253 CTTCCCTG            |    |    |   |                |
| 1  | mm10_knownGene_uc029rwx.1 | 19 | 25 | - | 10.8143 9.74e- |
| 05 | 0.253 CTTCCCTG            |    |    |   |                |
| 1  | mm10_knownGene_uc009mye.2 | 25 | 31 | + | 10.8143 9.74e- |
| 05 | 0.253 CTTCCCTG            |    |    |   |                |
| 1  | mm10_knownGene_uc009flf.2 | 19 | 25 | - | 10.8143 9.74e- |
| 05 | 0.253 CTCCCTG             |    |    |   |                |
| 1  | mm10_knownGene_uc007wjh.1 | 25 | 31 | + | 10.8143 9.74e- |
| 05 | 0.253 CTCCCTG             |    |    |   |                |
| 1  | mm10_knownGene_uc011yng.2 | 25 | 31 | + | 10.8143 9.74e- |
| 05 | 0.253 CTTCCCTG            |    |    |   |                |
| 1  | mm10_knownGene_uc033gqs.1 | 25 | 31 | + | 10.8143 9.74e- |
| 05 | 0.253 CTTCCCTG            |    |    |   |                |
| 1  | mm10_knownGene_uc008dag.1 | 25 | 31 | + | 10.8143 9.74e- |
| 05 | 0.253 CTCCCTG             |    |    |   |                |
| 1  | mm10_knownGene_uc008yel.1 | 25 | 31 | + | 10.8143 9.74e- |
| 05 | 0.253 CTTCCCTG            |    |    |   |                |

|    |                           |    |    |   |                |
|----|---------------------------|----|----|---|----------------|
| 1  | mm10_knownGene_uc009sts.2 | 19 | 25 | - | 10.8143 9.74e- |
| 05 | 0.253 CTCCCTG             |    |    |   |                |
| 1  | mm10_knownGene_uc007wiz.2 | 25 | 31 | + | 10.8143 9.74e- |
| 05 | 0.253 CTCCCTG             |    |    |   |                |
| 1  | mm10_knownGene_uc008mwn.1 | 25 | 31 | + | 10.8143 9.74e- |
| 05 | 0.253 CTTCTG              |    |    |   |                |
| 1  | mm10_knownGene_uc012fba.1 | 19 | 25 | - | 10.8143 9.74e- |
| 05 | 0.253 CTCCCTG             |    |    |   |                |
| 1  | mm10_knownGene_uc007ybg.1 | 25 | 31 | + | 10.8143 9.74e- |
| 05 | 0.253 CTCCCTG             |    |    |   |                |
| 1  | mm10_knownGene_uc057bew.1 | 19 | 25 | - | 10.8143 9.74e- |
| 05 | 0.253 CTTCTG              |    |    |   |                |
| 1  | mm10_knownGene_uc009tnn.2 | 19 | 25 | - | 10.8143 9.74e- |
| 05 | 0.253 CTCCCTG             |    |    |   |                |
| 1  | mm10_knownGene_uc007qbg.1 | 25 | 31 | + | 10.8143 9.74e- |
| 05 | 0.253 CTCCCTG             |    |    |   |                |
| 1  | mm10_knownGene_uc009uzn.2 | 19 | 25 | - | 10.8143 9.74e- |
| 05 | 0.253 CTCCCTG             |    |    |   |                |
| 1  | mm10_knownGene_uc029vnm.1 | 19 | 25 | - | 10.8143 9.74e- |
| 05 | 0.253 CTCCCTG             |    |    |   |                |
| 1  | mm10_knownGene_uc029rtq.1 | 25 | 31 | + | 10.8143 9.74e- |
| 05 | 0.253 CTTCTG              |    |    |   |                |
| 1  | mm10_knownGene_uc056zzw.1 | 19 | 25 | - | 10.8143 9.74e- |
| 05 | 0.253 CTCCCTG             |    |    |   |                |
| 1  | mm10_knownGene_uc009cpd.1 | 25 | 31 | + | 10.8143 9.74e- |
| 05 | 0.253 CTCCCTG             |    |    |   |                |
| 1  | mm10_knownGene_uc009stu.2 | 19 | 25 | - | 10.8143 9.74e- |
| 05 | 0.253 CTCCCTG             |    |    |   |                |
| 1  | mm10_knownGene_uc009uzm.2 | 19 | 25 | - | 10.8143 9.74e- |
| 05 | 0.253 CTCCCTG             |    |    |   |                |
| 1  | mm10_knownGene_uc007ckt.3 | 19 | 25 | - | 10.8143 9.74e- |
| 05 | 0.253 CTTCTG              |    |    |   |                |
| 1  | mm10_knownGene_uc009gnr.2 | 19 | 25 | - | 10.8143 9.74e- |
| 05 | 0.253 CTCCCTG             |    |    |   |                |
| 1  | mm10_knownGene_uc008zep.1 | 19 | 25 | - | 10.8143 9.74e- |
| 05 | 0.253 CTCCCTG             |    |    |   |                |
| 1  | mm10_knownGene_uc011zdf.1 | 25 | 31 | + | 10.8143 9.74e- |
| 05 | 0.253 CTTCTG              |    |    |   |                |
| 1  | mm10_knownGene_uc007ybp.1 | 25 | 31 | + | 10.8143 9.74e- |
| 05 | 0.253 CTCCCTG             |    |    |   |                |
| 1  | mm10_knownGene_uc011ynh.2 | 25 | 31 | + | 10.8143 9.74e- |
| 05 | 0.253 CTTCTG              |    |    |   |                |
| 1  | mm10_knownGene_uc009gio.2 | 25 | 31 | + | 10.8143 9.74e- |
| 05 | 0.253 CTTCTG              |    |    |   |                |
| 1  | mm10_knownGene_uc007nti.2 | 25 | 31 | + | 10.8143 9.74e- |
| 05 | 0.253 CTTCTG              |    |    |   |                |
| 1  | mm10_knownGene_uc008gql.1 | 19 | 25 | - | 10.8143 9.74e- |
| 05 | 0.253 CTTCTG              |    |    |   |                |
| 1  | mm10_knownGene_uc007nth.2 | 25 | 31 | + | 10.8143 9.74e- |
| 05 | 0.253 CTTCTG              |    |    |   |                |
| 1  | mm10_knownGene_uc009myd.2 | 25 | 31 | + | 10.8143 9.74e- |
| 05 | 0.253 CTTCTG              |    |    |   |                |
| 1  | mm10_knownGene_uc009lss.2 | 25 | 31 | + | 10.8143 9.74e- |
| 05 | 0.253 CTCCCTG             |    |    |   |                |
| 1  | mm10_knownGene_uc007awm.2 | 25 | 31 | + | 10.8143 9.74e- |
| 05 | 0.253 CTCCCTG             |    |    |   |                |
| 1  | mm10_knownGene_uc008lkm.1 | 25 | 31 | + | 10.8143 9.74e- |
| 05 | 0.253 CTTCTG              |    |    |   |                |
| 1  | mm10_knownGene_uc009stt.2 | 19 | 25 | - | 10.8143 9.74e- |
| 05 | 0.253 CTCCCTG             |    |    |   |                |
| 1  | mm10_knownGene_uc008ncc.1 | 25 | 31 | + | 10.8143 9.74e- |
| 05 | 0.253 CTTCTG              |    |    |   |                |

|    |                           |    |    |   |                |
|----|---------------------------|----|----|---|----------------|
| 1  | mm10_knownGene_uc008feh.1 | 25 | 31 | + | 10.8143 9.74e- |
| 05 | 0.253 CTTCCTG             |    |    |   |                |
| 1  | mm10_knownGene_uc007pbw.1 | 19 | 25 | - | 10.8143 9.74e- |
| 05 | 0.253 CTCCCTG             |    |    |   |                |
| 1  | mm10_knownGene_uc007awn.2 | 25 | 31 | + | 10.8143 9.74e- |
| 05 | 0.253 CTCCCTG             |    |    |   |                |
| 1  | mm10_knownGene_uc007pbx.1 | 19 | 25 | - | 10.8143 9.74e- |
| 05 | 0.253 CTCCCTG             |    |    |   |                |
| 1  | mm10_knownGene_uc007awl.2 | 25 | 31 | + | 10.8143 9.74e- |
| 05 | 0.253 CTCCCTG             |    |    |   |                |
| 1  | mm10_knownGene_uc057cgf.1 | 25 | 31 | + | 10.8143 9.74e- |
| 05 | 0.253 CTCCCTG             |    |    |   |                |
| 1  | mm10_knownGene_uc008mlu.1 | 26 | 32 | + | 10.8143 9.74e- |
| 05 | 0.253 CTCCCTG             |    |    |   |                |
| 1  | mm10_knownGene_uc009arv.2 | 20 | 26 | - | 10.8143 9.74e- |
| 05 | 0.253 CTTCCTG             |    |    |   |                |
| 1  | mm10_knownGene_uc008crm.1 | 26 | 32 | + | 10.8143 9.74e- |
| 05 | 0.253 CTCCCTG             |    |    |   |                |
| 1  | mm10_knownGene_uc008tzc.1 | 26 | 32 | + | 10.8143 9.74e- |
| 05 | 0.253 CTCCCTG             |    |    |   |                |
| 1  | mm10_knownGene_uc012gfi.1 | 20 | 26 | - | 10.8143 9.74e- |
| 05 | 0.253 CTCCCTG             |    |    |   |                |
| 1  | mm10_knownGene_uc008bmf.1 | 26 | 32 | + | 10.8143 9.74e- |
| 05 | 0.253 CTTCCTG             |    |    |   |                |
| 1  | mm10_knownGene_uc029uvx.1 | 26 | 32 | + | 10.8143 9.74e- |
| 05 | 0.253 CTTCCTG             |    |    |   |                |
| 1  | mm10_knownGene_uc009bce.1 | 26 | 32 | + | 10.8143 9.74e- |
| 05 | 0.253 CTTCCTG             |    |    |   |                |
| 1  | mm10_knownGene_uc009dlj.2 | 26 | 32 | + | 10.8143 9.74e- |
| 05 | 0.253 CTCCCTG             |    |    |   |                |
| 1  | mm10_knownGene_uc008mns.1 | 20 | 26 | - | 10.8143 9.74e- |
| 05 | 0.253 CTTCCTG             |    |    |   |                |
| 1  | mm10_knownGene_uc008ojg.1 | 20 | 26 | - | 10.8143 9.74e- |
| 05 | 0.253 CTCCCTG             |    |    |   |                |
| 1  | mm10_knownGene_uc009mbr.2 | 20 | 26 | - | 10.8143 9.74e- |
| 05 | 0.253 CTCCCTG             |    |    |   |                |
| 1  | mm10_knownGene_uc057bzo.1 | 20 | 26 | - | 10.8143 9.74e- |
| 05 | 0.253 CTTCCTG             |    |    |   |                |
| 1  | mm10_knownGene_uc007sgx.1 | 20 | 26 | - | 10.8143 9.74e- |
| 05 | 0.253 CTTCCTG             |    |    |   |                |
| 1  | mm10_knownGene_uc009lpf.1 | 26 | 32 | + | 10.8143 9.74e- |
| 05 | 0.253 CTTCCTG             |    |    |   |                |
| 1  | mm10_knownGene_uc008sks.1 | 20 | 26 | - | 10.8143 9.74e- |
| 05 | 0.253 CTTCCTG             |    |    |   |                |
| 1  | mm10_knownGene_uc029ujf.2 | 20 | 26 | - | 10.8143 9.74e- |
| 05 | 0.253 CTCCCTG             |    |    |   |                |
| 1  | mm10_knownGene_uc029vrs.1 | 20 | 26 | - | 10.8143 9.74e- |
| 05 | 0.253 CTTCCTG             |    |    |   |                |
| 1  | mm10_knownGene_uc012cmd.1 | 20 | 26 | - | 10.8143 9.74e- |
| 05 | 0.253 CTCCCTG             |    |    |   |                |
| 1  | mm10_knownGene_uc009bax.2 | 26 | 32 | + | 10.8143 9.74e- |
| 05 | 0.253 CTTCCTG             |    |    |   |                |
| 1  | mm10_knownGene_uc008utx.1 | 26 | 32 | + | 10.8143 9.74e- |
| 05 | 0.253 CTCCCTG             |    |    |   |                |
| 1  | mm10_knownGene_uc009baw.2 | 26 | 32 | + | 10.8143 9.74e- |
| 05 | 0.253 CTTCCTG             |    |    |   |                |
| 1  | mm10_knownGene_uc008oij.2 | 20 | 26 | - | 10.8143 9.74e- |
| 05 | 0.253 CTCCCTG             |    |    |   |                |
| 1  | mm10_knownGene_uc009kbf.1 | 26 | 32 | + | 10.8143 9.74e- |
| 05 | 0.253 CTCCCTG             |    |    |   |                |
| 1  | mm10_knownGene_uc007cxy.1 | 26 | 32 | + | 10.8143 9.74e- |
| 05 | 0.253 CTTCCTG             |    |    |   |                |

|    |                           |    |    |   |                |
|----|---------------------------|----|----|---|----------------|
| 1  | mm10_knownGene_uc008cos.1 | 26 | 32 | + | 10.8143 9.74e- |
| 05 | 0.253 CTCCCTG             |    |    |   |                |
| 1  | mm10_knownGene_uc007lec.1 | 26 | 32 | + | 10.8143 9.74e- |
| 05 | 0.253 CTCCCTG             |    |    |   |                |
| 1  | mm10_knownGene_uc033jum.1 | 26 | 32 | + | 10.8143 9.74e- |
| 05 | 0.253 CTTCCCTG            |    |    |   |                |
| 1  | mm10_knownGene_uc033gys.1 | 20 | 26 | - | 10.8143 9.74e- |
| 05 | 0.253 CTCCCTG             |    |    |   |                |
| 1  | mm10_knownGene_uc009bcg.1 | 26 | 32 | + | 10.8143 9.74e- |
| 05 | 0.253 CTTCCCTG            |    |    |   |                |
| 1  | mm10_knownGene_uc007uob.2 | 26 | 32 | + | 10.8143 9.74e- |
| 05 | 0.253 CTCCCTG             |    |    |   |                |
| 1  | mm10_knownGene_uc009iqw.1 | 20 | 26 | - | 10.8143 9.74e- |
| 05 | 0.253 CTTCCCTG            |    |    |   |                |
| 1  | mm10_knownGene_uc009bcf.1 | 26 | 32 | + | 10.8143 9.74e- |
| 05 | 0.253 CTTCCCTG            |    |    |   |                |
| 1  | mm10_knownGene_uc008hga.2 | 26 | 32 | + | 10.8143 9.74e- |
| 05 | 0.253 CTCCCTG             |    |    |   |                |
| 1  | mm10_knownGene_uc008eru.1 | 26 | 32 | + | 10.8143 9.74e- |
| 05 | 0.253 CTCCCTG             |    |    |   |                |
| 1  | mm10_knownGene_uc008utw.1 | 26 | 32 | + | 10.8143 9.74e- |
| 05 | 0.253 CTCCCTG             |    |    |   |                |
| 1  | mm10_knownGene_uc012bks.1 | 26 | 32 | + | 10.8143 9.74e- |
| 05 | 0.253 CTCCCTG             |    |    |   |                |
| 1  | mm10_knownGene_uc007dgw.1 | 26 | 32 | + | 10.8143 9.74e- |
| 05 | 0.253 CTTCCCTG            |    |    |   |                |
| 1  | mm10_knownGene_uc008ypr.2 | 20 | 26 | - | 10.8143 9.74e- |
| 05 | 0.253 CTTCCCTG            |    |    |   |                |
| 1  | mm10_knownGene_uc008dls.1 | 20 | 26 | - | 10.8143 9.74e- |
| 05 | 0.253 CTTCCCTG            |    |    |   |                |
| 1  | mm10_knownGene_uc008apz.2 | 26 | 32 | + | 10.8143 9.74e- |
| 05 | 0.253 CTTCCCTG            |    |    |   |                |
| 1  | mm10_knownGene_uc012eqz.1 | 27 | 33 | + | 10.8143 9.74e- |
| 05 | 0.253 CTTCCCTG            |    |    |   |                |
| 1  | mm10_knownGene_uc012fjv.1 | 21 | 27 | - | 10.8143 9.74e- |
| 05 | 0.253 CTTCCCTG            |    |    |   |                |
| 1  | mm10_knownGene_uc029qnu.1 | 27 | 33 | + | 10.8143 9.74e- |
| 05 | 0.253 CTCCCTG             |    |    |   |                |
| 1  | mm10_knownGene_uc008qvj.1 | 21 | 27 | - | 10.8143 9.74e- |
| 05 | 0.253 CTCCCTG             |    |    |   |                |
| 1  | mm10_knownGene_uc008tzi.1 | 27 | 33 | + | 10.8143 9.74e- |
| 05 | 0.253 CTCCCTG             |    |    |   |                |
| 1  | mm10_knownGene_uc007unn.1 | 27 | 33 | + | 10.8143 9.74e- |
| 05 | 0.253 CTCCCTG             |    |    |   |                |
| 1  | mm10_knownGene_uc012egm.1 | 21 | 27 | - | 10.8143 9.74e- |
| 05 | 0.253 CTCCCTG             |    |    |   |                |
| 1  | mm10_knownGene_uc012gru.1 | 21 | 27 | - | 10.8143 9.74e- |
| 05 | 0.253 CTCCCTG             |    |    |   |                |
| 1  | mm10_knownGene_uc009grc.1 | 21 | 27 | - | 10.8143 9.74e- |
| 05 | 0.253 CTTCCCTG            |    |    |   |                |
| 1  | mm10_knownGene_uc056ykh.1 | 21 | 27 | - | 10.8143 9.74e- |
| 05 | 0.253 CTCCCTG             |    |    |   |                |
| 1  | mm10_knownGene_uc029sbv.1 | 21 | 27 | - | 10.8143 9.74e- |
| 05 | 0.253 CTTCCCTG            |    |    |   |                |
| 1  | mm10_knownGene_uc009jjs.1 | 21 | 27 | - | 10.8143 9.74e- |
| 05 | 0.253 CTCCCTG             |    |    |   |                |
| 1  | mm10_knownGene_uc009coz.2 | 21 | 27 | - | 10.8143 9.74e- |
| 05 | 0.253 CTCCCTG             |    |    |   |                |
| 1  | mm10_knownGene_uc007oiu.2 | 27 | 33 | + | 10.8143 9.74e- |
| 05 | 0.253 CTCCCTG             |    |    |   |                |
| 1  | mm10_knownGene_uc008hpo.1 | 21 | 27 | - | 10.8143 9.74e- |
| 05 | 0.253 CTCCCTG             |    |    |   |                |



|    |                           |    |    |   |                |
|----|---------------------------|----|----|---|----------------|
| 1  | mm10_knownGene_uc011zit.1 | 27 | 33 | + | 10.8143 9.74e- |
| 05 | 0.253 CTTCCTG             |    |    |   |                |
| 1  | mm10_knownGene_uc029vyr.1 | 21 | 27 | - | 10.8143 9.74e- |
| 05 | 0.253 CTCCCTG             |    |    |   |                |
| 1  | mm10_knownGene_uc009iwd.1 | 27 | 33 | + | 10.8143 9.74e- |
| 05 | 0.253 CTCCCTG             |    |    |   |                |
| 1  | mm10_knownGene_uc008boo.2 | 27 | 33 | + | 10.8143 9.74e- |
| 05 | 0.253 CTCCCTG             |    |    |   |                |
| 1  | mm10_knownGene_uc007mec.1 | 27 | 33 | + | 10.8143 9.74e- |
| 05 | 0.253 CTTCCTG             |    |    |   |                |
| 1  | mm10_knownGene_uc012era.1 | 27 | 33 | + | 10.8143 9.74e- |
| 05 | 0.253 CTTCCTG             |    |    |   |                |
| 1  | mm10_knownGene_uc057caq.1 | 27 | 33 | + | 10.8143 9.74e- |
| 05 | 0.253 CTCCCTG             |    |    |   |                |
| 1  | mm10_knownGene_uc007ujt.1 | 21 | 27 | - | 10.8143 9.74e- |
| 05 | 0.253 CTTCCTG             |    |    |   |                |
| 1  | mm10_knownGene_uc009aol.1 | 27 | 33 | + | 10.8143 9.74e- |
| 05 | 0.253 CTTCCTG             |    |    |   |                |
| 1  | mm10_knownGene_uc009orh.1 | 21 | 27 | - | 10.8143 9.74e- |
| 05 | 0.253 CTTCCTG             |    |    |   |                |
| 1  | mm10_knownGene_uc009dvu.2 | 21 | 27 | - | 10.8143 9.74e- |
| 05 | 0.253 CTCCCTG             |    |    |   |                |
| 1  | mm10_knownGene_uc057car.1 | 27 | 33 | + | 10.8143 9.74e- |
| 05 | 0.253 CTCCCTG             |    |    |   |                |
| 1  | mm10_knownGene_uc009ipt.1 | 27 | 33 | + | 10.8143 9.74e- |
| 05 | 0.253 CTTCCTG             |    |    |   |                |
| 1  | mm10_knownGene_uc012fpt.1 | 28 | 34 | + | 10.8143 9.74e- |
| 05 | 0.253 CTCCCTG             |    |    |   |                |
| 1  | mm10_knownGene_uc009hpu.1 | 28 | 34 | + | 10.8143 9.74e- |
| 05 | 0.253 CTCCCTG             |    |    |   |                |
| 1  | mm10_knownGene_uc009qrl.2 | 28 | 34 | + | 10.8143 9.74e- |
| 05 | 0.253 CTTCCTG             |    |    |   |                |
| 1  | mm10_knownGene_uc008nqi.1 | 28 | 34 | + | 10.8143 9.74e- |
| 05 | 0.253 CTTCCTG             |    |    |   |                |
| 1  | mm10_knownGene_uc008tnd.1 | 22 | 28 | - | 10.8143 9.74e- |
| 05 | 0.253 CTCCCTG             |    |    |   |                |
| 1  | mm10_knownGene_uc008gyw.2 | 22 | 28 | - | 10.8143 9.74e- |
| 05 | 0.253 CTCCCTG             |    |    |   |                |
| 1  | mm10_knownGene_uc007frl.2 | 28 | 34 | + | 10.8143 9.74e- |
| 05 | 0.253 CTCCCTG             |    |    |   |                |
| 1  | mm10_knownGene_uc029xiv.1 | 22 | 28 | - | 10.8143 9.74e- |
| 05 | 0.253 CTCCCTG             |    |    |   |                |
| 1  | mm10_knownGene_uc009oyv.1 | 22 | 28 | - | 10.8143 9.74e- |
| 05 | 0.253 CTTCCTG             |    |    |   |                |
| 1  | mm10_knownGene_uc009mta.2 | 28 | 34 | + | 10.8143 9.74e- |
| 05 | 0.253 CTTCCTG             |    |    |   |                |
| 1  | mm10_knownGene_uc008wip.2 | 22 | 28 | - | 10.8143 9.74e- |
| 05 | 0.253 CTTCCTG             |    |    |   |                |
| 1  | mm10_knownGene_uc007ytw.2 | 22 | 28 | - | 10.8143 9.74e- |
| 05 | 0.253 CTTCCTG             |    |    |   |                |
| 1  | mm10_knownGene_uc007veq.2 | 22 | 28 | - | 10.8143 9.74e- |
| 05 | 0.253 CTCCCTG             |    |    |   |                |
| 1  | mm10_knownGene_uc008chm.2 | 22 | 28 | - | 10.8143 9.74e- |
| 05 | 0.253 CTCCCTG             |    |    |   |                |
| 1  | mm10_knownGene_uc009jiw.1 | 22 | 28 | - | 10.8143 9.74e- |
| 05 | 0.253 CTTCCTG             |    |    |   |                |
| 1  | mm10_knownGene_uc007cbr.1 | 22 | 28 | - | 10.8143 9.74e- |
| 05 | 0.253 CTCCCTG             |    |    |   |                |
| 1  | mm10_knownGene_uc012bnq.2 | 28 | 34 | + | 10.8143 9.74e- |
| 05 | 0.253 CTTCCTG             |    |    |   |                |
| 1  | mm10_knownGene_uc009rho.1 | 22 | 28 | - | 10.8143 9.74e- |
| 05 | 0.253 CTTCCTG             |    |    |   |                |

|    |                           |    |    |   |                |
|----|---------------------------|----|----|---|----------------|
| 1  | mm10_knownGene_uc009rhl.1 | 22 | 28 | - | 10.8143 9.74e- |
| 05 | 0.253 CTTCCCTG            |    |    |   |                |
| 1  | mm10_knownGene_uc029trk.1 | 22 | 28 | - | 10.8143 9.74e- |
| 05 | 0.253 CTTCCCTG            |    |    |   |                |
| 1  | mm10_knownGene_uc007tzi.1 | 28 | 34 | + | 10.8143 9.74e- |
| 05 | 0.253 CTTCCCTG            |    |    |   |                |
| 1  | mm10_knownGene_uc009rhn.1 | 22 | 28 | - | 10.8143 9.74e- |
| 05 | 0.253 CTTCCCTG            |    |    |   |                |
| 1  | mm10_knownGene_uc009rhm.1 | 22 | 28 | - | 10.8143 9.74e- |
| 05 | 0.253 CTTCCCTG            |    |    |   |                |
| 1  | mm10_knownGene_uc007dyg.1 | 28 | 34 | + | 10.8143 9.74e- |
| 05 | 0.253 CTCCCTG             |    |    |   |                |
| 1  | mm10_knownGene_uc008eyu.1 | 28 | 34 | + | 10.8143 9.74e- |
| 05 | 0.253 CTCCCTG             |    |    |   |                |
| 1  | mm10_knownGene_uc007ixo.1 | 22 | 28 | - | 10.8143 9.74e- |
| 05 | 0.253 CTTCCCTG            |    |    |   |                |
| 1  | mm10_knownGene_uc008pui.1 | 28 | 34 | + | 10.8143 9.74e- |
| 05 | 0.253 CTTCCCTG            |    |    |   |                |
| 1  | mm10_knownGene_uc009bdq.1 | 28 | 34 | + | 10.8143 9.74e- |
| 05 | 0.253 CTTCCCTG            |    |    |   |                |
| 1  | mm10_knownGene_uc009etk.1 | 22 | 28 | - | 10.8143 9.74e- |
| 05 | 0.253 CTTCCCTG            |    |    |   |                |
| 1  | mm10_knownGene_uc008emx.1 | 22 | 28 | - | 10.8143 9.74e- |
| 05 | 0.253 CTTCCCTG            |    |    |   |                |
| 1  | mm10_knownGene_uc007ver.2 | 22 | 28 | - | 10.8143 9.74e- |
| 05 | 0.253 CTCCCTG             |    |    |   |                |
| 1  | mm10_knownGene_uc011yde.2 | 29 | 35 | + | 10.8143 9.74e- |
| 05 | 0.253 CTCCCTG             |    |    |   |                |
| 1  | mm10_knownGene_uc008qsl.3 | 29 | 35 | + | 10.8143 9.74e- |
| 05 | 0.253 CTTCCCTG            |    |    |   |                |
| 1  | mm10_knownGene_uc008nvu.1 | 23 | 29 | - | 10.8143 9.74e- |
| 05 | 0.253 CTTCCCTG            |    |    |   |                |
| 1  | mm10_knownGene_uc011zby.2 | 23 | 29 | - | 10.8143 9.74e- |
| 05 | 0.253 CTTCCCTG            |    |    |   |                |
| 1  | mm10_knownGene_uc033fjg.1 | 23 | 29 | - | 10.8143 9.74e- |
| 05 | 0.253 CTTCCCTG            |    |    |   |                |
| 1  | mm10_knownGene_uc011ydh.1 | 23 | 29 | - | 10.8143 9.74e- |
| 05 | 0.253 CTTCCCTG            |    |    |   |                |
| 1  | mm10_knownGene_uc033fzl.1 | 29 | 35 | + | 10.8143 9.74e- |
| 05 | 0.253 CTCCCTG             |    |    |   |                |
| 1  | mm10_knownGene_uc009pqf.2 | 23 | 29 | - | 10.8143 9.74e- |
| 05 | 0.253 CTTCCCTG            |    |    |   |                |
| 1  | mm10_knownGene_uc009drm.1 | 29 | 35 | + | 10.8143 9.74e- |
| 05 | 0.253 CTTCCCTG            |    |    |   |                |
| 1  | mm10_knownGene_uc008fjh.1 | 23 | 29 | - | 10.8143 9.74e- |
| 05 | 0.253 CTCCCTG             |    |    |   |                |
| 1  | mm10_knownGene_uc029tco.1 | 23 | 29 | - | 10.8143 9.74e- |
| 05 | 0.253 CTTCCCTG            |    |    |   |                |
| 1  | mm10_knownGene_uc008fmx.1 | 23 | 29 | - | 10.8143 9.74e- |
| 05 | 0.253 CTTCCCTG            |    |    |   |                |
| 1  | mm10_knownGene_uc029wxj.1 | 23 | 29 | - | 10.8143 9.74e- |
| 05 | 0.253 CTCCCTG             |    |    |   |                |
| 1  | mm10_knownGene_uc008geo.2 | 29 | 35 | + | 10.8143 9.74e- |
| 05 | 0.253 CTTCCCTG            |    |    |   |                |
| 1  | mm10_knownGene_uc007eaz.1 | 29 | 35 | + | 10.8143 9.74e- |
| 05 | 0.253 CTTCCCTG            |    |    |   |                |
| 1  | mm10_knownGene_uc007geq.1 | 23 | 29 | - | 10.8143 9.74e- |
| 05 | 0.253 CTTCCCTG            |    |    |   |                |
| 1  | mm10_knownGene_uc007eyu.2 | 23 | 29 | - | 10.8143 9.74e- |
| 05 | 0.253 CTTCCCTG            |    |    |   |                |
| 1  | mm10_knownGene_uc033fwn.1 | 23 | 29 | - | 10.8143 9.74e- |
| 05 | 0.253 CTTCCCTG            |    |    |   |                |

|    |                           |    |    |   |                |
|----|---------------------------|----|----|---|----------------|
| 1  | mm10_knownGene_uc008nvv.1 | 23 | 29 | - | 10.8143 9.74e- |
| 05 | 0.253 CTCCTG              |    |    |   |                |
| 1  | mm10_knownGene_uc007mfz.1 | 29 | 35 | + | 10.8143 9.74e- |
| 05 | 0.253 CTCCTG              |    |    |   |                |
| 1  | mm10_knownGene_u          |    |    |   |                |
